# Supplementary material for: Randomized phase I trial HIV-CORE 003: Depletion of serum amyloid P component and immunogenicity of DNA vaccination against HIV-1
Source: PubMed Central journal article supplement (PMC5957335; doi:10.1371/journal.pone.0197299), 2018-05-17
Supplement: pone.0197299.s001.pdf [file pone.0197299.s001.pdf]

Group 1 CPHPC

| Vacc<br>Week<br>Visit | Screen | DNA  |     | DNA |     | DNA |      | ChAdV63 |      | 16  | 18  | 20  |
|-----------------------|--------|------|-----|-----|-----|-----|------|---------|------|-----|-----|-----|
|                       |        | 0    | 2   | 4   | 6   | 8   | 10   | 12      | 14   |     |     |     |
|                       |        | 1    | 2   | 3   | 4   | 5   | 6    | 7       | 8    |     |     |     |
| 601                   | -45    | -115 | -55 | -20 | -35 | 45  | -230 | 165     | 150  | 435 | 190 | 180 |
| 605                   | 45     | -30  | 15  | -35 | -40 | -30 | 10   | -105    | 1590 | 840 | 560 | 265 |
| 606                   | 35     | 40   | -35 | -25 | 15  | 20  | -10  | 20      | 90   | 260 | 175 | 125 |
| 607                   | 20     | 65   | 25  | 50  | 350 | 190 | 175  | 65      | 240  | ND  | ND  | ND  |

| Vacc<br>Week<br>Visit | Screen | DNA  |      | DNA  |      | DNA  |      | ChAdV63 |      | MVA  |      | 17    | 18    | 20    |
|-----------------------|--------|------|------|------|------|------|------|---------|------|------|------|-------|-------|-------|
|                       |        | 0    | 2    | 4    | 6    | 8    | 10   | 12      | 13   | 14   | 16   |       |       |       |
|                       |        | 1    | 2a   | 3    | 4a   | 5    | 6a   | 7       | 8    | 9    | 10   |       |       |       |
| 609                   | 0      | -5   | 50   | Fail | 0    | 35   | 35   | -47.5   | 45   | 105  | 145  | 830   | 730   | 290   |
| 613                   | 45     | -40  | -85  | 10   | -25  | 5    | -10  | -55     | 1490 | 935  | 1000 | 6370  | 9400  | 8920  |
| 614                   | 25     | 5    | -25  | -70  | -20  | 25   | -155 | 15      | 80   | 155  | 85   | 1430  | 4260  | 2440  |
| 615                   | -70    | 5    | 0    | -70  | -5   | -45  | 20   | -25     | 455  | 2385 | 2785 | 14410 | 20305 | 14575 |
| 616                   | -2.5   | -20  | -5   | 15   | -20  | 190  | 180  | 65      | 255  | 210  | 65   | 1300  | 1740  | 670   |
| 619                   | -100   | 55   | -155 | -240 | -220 | -70  | -120 | -65     | -295 | 920  | 410  | 3520  | 3740  | 1420  |
| 621                   | 105    | -5   | 25   | -20  | 100  | 10   | 70   | 15      | 790  | 475  | 330  | 2880  | 1290  | 800   |
| 622                   | -110   | Fail | 130  | -95  | -70  | 150  | 55   | 60      | 90   | 50   | 135  | 2640  | 1830  | 1010  |
| 627                   | 0      | -35  | 0    | -35  | 20   | 5    | 20   | 5       | 380  | 740  | 405  | 3530  | 9010  | 6280  |
| 628                   | 20     | -15  | 0    | 75   | 45   | 20   | 70   | 70      | 940  | 785  | 495  | 2690  | 2850  | 2950  |
| 631                   | -20    | 30   | 0    | 15   | ND   | 25   | 5    | -5      | 580  | 290  | 325  | 2000  | 880   | 1130  |
| 632                   | -35    | -35  | -70  | -110 | -185 | -130 | -110 | -35     | 375  | 1325 | 990  | 2710  | 6300  | 3860  |
| 634                   | 75     | -10  | 20   | 50   | 210  | 0    | 145  | 0       | 2435 | 1340 | 615  | 2430  | 4120  | 3310  |
| 635                   | 30     | 30   | 5    | 25   | 5    | 20   | 35   | 45      | 1670 | 1445 | 760  | 2870  | 2315  | 2820  |
| 637                   | 20     | -60  | -130 | 15   | 810  | 345  | 630  | 185     | 515  | 655  | 880  | 2800  | 5090  | 3670  |
| 638                   | -100   | -110 | -340 | -105 | 40   | 70   | -40  | 55      | 285  | 2285 | 870  | 1400  | 1570  | 1170  |

Group 2 placebo

| Vacc<br>Week<br>Visit | Screen | DNA  |      | DNA  |     | DNA  |     | ChAdV63 |      | 16  | 18  | 20  |
|-----------------------|--------|------|------|------|-----|------|-----|---------|------|-----|-----|-----|
|                       |        | 0    | 2    | 4    | 6   | 8    | 10  | 12      | 14   |     |     |     |
|                       |        | 1    | 2    | 3    | 4   | 5    | 6   | 7       | 8    |     |     |     |
| 602                   | -30    | -85  | -25  | 30   | -55 | -115 | -5  | 75      | 150  | -5  | -80 | 40  |
| 603                   | 140    | 35   | -25  | 40   | 60  | 115  | 220 | 50      | 615  | 90  | 120 | 175 |
| 608                   | -35    | -105 | -195 | -110 | -45 | -60  | -30 | 25      | 1480 | 590 | 415 | 355 |

| Vacc<br>Week<br>Visit | Screen | DNA  |     | DNA |      | DNA |     | ChAdV63 |      | MVA  |      | 18   | 20   |      |
|-----------------------|--------|------|-----|-----|------|-----|-----|---------|------|------|------|------|------|------|
|                       |        | 0    | 2   | 4   | 6    | 8   | 10  | 12      | 13   | 14   | 16   |      |      | 17   |
|                       |        | 1    | 2a  | 3   | 4a   | 5   | 6a  | 7       | 8    | 9    | 10   |      |      | 11   |
| 610                   | 5      | 30   | -45 | 30  | -55  | -90 | 45  | 25      | 40   | 830  | 1130 | 3010 | 3670 | 7210 |
| 611                   | 5      | 0    | -10 | -50 | -35  | 10  | -25 | 55      | 6215 | 2330 | 2765 | 2510 | 3710 | 3570 |
| 612                   | -10    | 45   | 40  | 10  | -15  | 55  | ND  | -25     | 20   | 830  | 655  | 3110 | 1310 | 840  |
| 617                   | -105   | -140 | 90  | -60 | 15   | -20 | -65 | -45     | 65   | 890  | 610  | 2900 | 2620 | 2290 |
| 618                   | -40    | 10   | -45 | -40 | -20  | -30 | -15 | 30      | 250  | 2740 | 2130 | 6800 | 9870 | 7010 |
| 620                   | 0      | -45  | -20 | 0   | 40   | -5  | 0   | 15      | 550  | 370  | 265  | 4740 | ND   | 4480 |
| 623                   | -180   | -40  | 30  | -55 | -80  | 0   | -45 | 130     | 380  | 555  | 710  | 3100 | 2770 | 2620 |
| 624                   | -25    | -10  | 15  | 10  | 30   | 10  | 0   | 10      | 1010 | 415  | 225  | 3240 | 4745 | 3065 |
| 625                   | 10     | 20   | 5   | 0   | 0    | -10 | -40 | -5      | 0    | 40   | 20   | 1440 | 500  | 190  |
| 626                   | 20     | 45   | -10 | -95 | -115 | -65 | 90  | -75     | 1655 | 1990 | 750  | 710  | 1530 | 1550 |
| 629                   | 0      | 10   | -30 | 30  | -10  | -20 | 5   | -35     | 65   | 775  | 660  | 3610 | 4330 | 3970 |
| 630                   | 5      | -10  | 35  | -35 | -10  | 5   | 5   | -5      | 50   | 3345 | 1340 | 640  | 2200 |      |
| 633                   | 10     | 15   | 25  | 15  | 0    | -5  | -10 | -15     | 470  | 1200 | 1210 | 4100 | 5090 | 3730 |
| 636                   | -25    | -5   | -20 | 40  | 15   | 50  | 190 | 60      | 3960 | 3420 | 2650 | 5830 | 5230 | 4040 |
| 639                   | -10    | -50  | -10 | 5   | 0    | -30 | -15 | -35     | 255  | 4950 | 1925 | 7470 | 8200 | 6830 |
| 641                   | FAIL   | -75  | 50  | -30 | -25  | 10  | 35  | 50      | -10  | 2540 | 710  | 2240 | 1500 | 1720 |

| Peak |                 |
|------|-----------------|
|      | DNA.HIVconsv    |
|      | ChAd63.HIVconsv |
|      | MVA.HIVconsv    |
