# Supplementary material for: Randomized phase I trial HIV-CORE 003: Depletion of serum amyloid P component and immunogenicity of DNA vaccination against HIV-1
Source: PubMed Central journal article supplement (PMC5957335; doi:10.1371/journal.pone.0197299), 2018-05-17
Supplement: pone.0197299.s002.pdf [file pone.0197299.s002.pdf]

**Less Bg/Per Million**

**CPHPC**

| PTID | Visit | Pool 1 | Pool 2 | Pool 3 | Pool 4 | Pool 5 | Pool 6 |
|------|-------|--------|--------|--------|--------|--------|--------|
| 602  | 8     | 75     | 825    | 578.5  | 237.5  | -112.5 | 175    |
| 603  | 8     | 200    | 212.5  | 387.5  | 87.5   | 37.5   | -12.5  |
| 608  | 8     | -62.5  | 100    | -125   | -162   | -337   | 37.5   |
| 610  | 7     | -187.5 | 62.5   | 100    | 37.5   | -150   | -100   |
| 611  | 8     | 137.5  | 337.5  | 350    | 87.5   | 25     | 162.5  |
| 612  | 7     | 37.5   | -50    | 12.5   | 0      | 0      | 175    |
| 617  | 8     | 125    | -25    | 0      | -37.5  | -62.5  | -75    |
| 618  | 8     | 25     | -12.5  | 37.5   | 87.5   | -25    | -25    |
| 620  | 8     | -12.5  | 12.5   | 50     | 25     | 50     | 0      |
| 623  | 8     | 50     | 37.5   | 112.5  | 0      | -12.5  | 0      |
| 624  | 8     | 137.5  | 62.5   | 37.5   | 225    | 100    | 275    |
| 625  | 8     | -12.5  | -125   | -137   | -75    | 162    | -225   |
| 626  | 8     | 350    | 37.5   | 75     | -37.5  | 175    | -12.5  |
| 629  | 8     | -50    | 12.5   | 50     | 87.5   | 12.5   | 25     |
| 630  | 8     | 50     | 37.5   | 37.5   | 12.5   | -12.5  | 50     |
| 633  | 8     | 62.5   | 37.5   | 37.5   | 12.5   | 12.5   | 37.5   |
| 636  | 8     | 112.5  | 25     | 250    | 37.5   | 50     | 150    |
| 639  | 8     | 425    | 0      | 25     | 37.5   | 12.5   | 112.5  |
| 641  | 8     | 12.5   | -25    | -112.5 | 162.5  | 37.5   | -50    |

**Less Bg/Per Million**

**Placebo**

| PTID | Visit | Pool 1 | Pool 2 | Pool 3 | Pool 4 | Pool 5 | Pool 6 |
|------|-------|--------|--------|--------|--------|--------|--------|
| 601  | 8     | 312.5  | 137.5  | 287.5  | 500    | 62.5   | 137.5  |
| 605  | 8     | 175    | 187    | 175    | 50     | 162.5  | 337.5  |
| 606  | 8     | 25     | -12.5  | 25     | 12.5   | 50     | 75     |
| 607  | 8     | 112.5  | 62.5   | 150    | 87.5   | 100    | 225    |
| 609  | 7     | -137.5 | 1212   | 525    | -62.5  | 75     | -112.5 |
| 613  | 8     | 25     | -25    | -50    | -25    | -100   | 0      |
| 614  | 8     | -37.5  | -225   | -150   | -137.5 | -125   | -37.5  |
| 615  | 8     | -50    | -75    | 337.5  | -62.5  | -50    | 87.5   |
| 616  | 8     | 212.5  | 0      | 287.5  | 137.5  | 87.5   | 162.5  |
| 619  | 8     | 12.5   | 50     | 37.5   | -25    | 12.5   | 62.5   |
| 621  | 8     | 62.5   | 12.5   | 0      | 12.5   | 12.5   | -37.5  |
| 622  | 8     | 0      | -37.5  | 0      | 25     | 50     | 62.5   |
| 627  | 8     | 337.5  | 550    | 75     | 50     | -25    | 12.5   |
| 628  | 8     | 12.5   | -25    | 50     | 112.5  | 150    | 237.5  |
| 631  | 8     | 12.5   | -87.5  | 0      | 75     | 0      | 12.5   |
| 632  | 8     | 75     | -212   | 1025   | 112.5  | 312.5  | 212.5  |
| 634  | 8     | 75     | 37.5   | 62.5   | 100    | 75     | -25    |
| 635  | 8     | 262.5  | 12.5   | 275    | 225    | 75     | 150    |
| 637  | 8     | 12.5   | 82.5   | 100    | 575    | 1112   | 900    |
| 638  | 8     | 37.5   | -87.5  | -12.5  | -12.5  | 37.5   | -37.5  |

| <b>Total</b> | <b>Ex Vivo</b> |
|--------------|----------------|
| 1778.5       | -115           |
| 912.5        | 115            |
| -549         | -60            |
| -237.5       | -55            |
| 1100         | 10             |
| 175          | -15            |
| -75          | -20            |
| 87.5         | -30            |
| 125          | -5             |
| 187.5        | 0              |
| 837.5        | 10             |
| -412.5       | -10            |
| 587.5        | -65            |
| 137.5        | -20            |
| 175          | 5              |
| 200          | -5             |
| 625          | 50             |
| 612.5        | -30            |
| 25           | 10             |

| <b>Total</b> | <b>Ex Vivo</b> |
|--------------|----------------|
| 1437.5       | 45             |
| 1087         | -30            |
| 175          | 20             |
| 737.5        | 190            |
| 1499.5       | 35             |
| -200         | 5              |
| -712.5       | 25             |
| 187.5        | -45            |
| 887.5        | 190            |
| 150          | -70            |
| 62.5         | 10             |
| 100          | 150            |
| 1000         | 5              |
| 537.5        | 20             |
| 12.5         | 25             |
| 1525.5       | -130           |
| 325          | 0              |
| 1000         | 20             |
| 2782         | 345            |
| -75          | 70             |
