# Supplementary material for: Randomized phase I trial HIV-CORE 003: Depletion of serum amyloid P component and immunogenicity of DNA vaccination against HIV-1
Source: PubMed Central journal article supplement (PMC5957335; doi:10.1371/journal.pone.0197299), 2018-05-17
Supplement: pone.0197299.s003.pdf [file pone.0197299.s003.pdf]

All concentrations (pg/ml) have the background from unstimulated cells removed

V1: Preimmune V2: Peak DNA V3: Peak ChAd63  
 TNFα CPHPC V1 V2 V3

|     |       |       |        |
|-----|-------|-------|--------|
| 602 | 1.3   | -2.6  | -1.0   |
| 603 | -21.4 | 22.8  | 55.1   |
| 608 | -8.5  | 2.6   | 42.7   |
| 610 | -10.9 | 63.2  | 98.0   |
| 611 | 28.9  | 35.2  | 30.2   |
| 612 | -30.9 | -37.5 | -142.1 |
| 617 | 4.0   | 12.4  | 7.9    |
| 618 | 24.9  | -28.8 | 40.4   |
| 620 | 3.4   | 0.5   | -0.5   |
| 623 | 25.6  | 60.8  | 55.0   |
| 624 | 3.9   | 10.6  | 14.9   |
| 625 | 52.0  | 24.5  | 12.6   |
| 626 | 0.8   | 1.2   | 7.3    |
| 629 | 24.2  | -6.8  | 1.6    |
| 630 | 19.6  | 15.1  | 23.5   |
| 633 | 8.5   | -0.9  | 4.9    |
| 636 | 30.0  | 102.6 | 68.4   |
| 639 | 69.0  | 46.1  | 204.4  |
| 641 | 30.3  | 55.2  | 45.5   |

TNFα Placebo V1 V2

|     |       |        |
|-----|-------|--------|
| 601 | -0.5  | -1.1   |
| 605 | -31.5 | 48.6   |
| 606 | 4.1   | -10.6  |
| 607 | 23.6  | 16.2   |
| 609 | 9.5   | 11.9   |
| 613 | 105.1 | 103.5  |
| 614 | 102.3 | 109.7  |
| 615 | 43.1  | 7.5    |
| 616 | 3.7   | 6.3    |
| 619 | 20.1  | 1.6    |
| 621 | 22.6  | 11.8   |
| 622 | 16.5  | 17.6   |
| 627 | -4.6  | -100.5 |
| 628 | 43.8  | 45.6   |
| 631 | -23.6 | 8.7    |
| 632 | 11.2  | -4.5   |
| 634 | 14.9  | 148.5  |
| 635 | 53.5  | 3.9    |
| 637 | 73.0  | 122.7  |
| 638 | -5.3  | 24.1   |

SDF-1α CPHPC V1 V2 V3

|     |        |       |       |
|-----|--------|-------|-------|
| 602 | -5.7   | -13.2 | -8.7  |
| 603 | 10.6   | 7.2   | 32.2  |
| 608 | 0.0    | 2.4   | 21.7  |
| 610 | -132.1 | -50.2 | 138.1 |
| 611 | -7.7   | -26.3 | 59.5  |
| 612 | 8.1    | 0.0   | -40.0 |
| 617 | -10.5  | 49.4  | -12.6 |
| 618 | 53.6   | -32.7 | 143.6 |
| 620 | -30.8  | -8.7  | -36.0 |
| 623 | 24.3   | 66.4  | 193.5 |
| 624 | 39.5   | 61.6  | 42.9  |
| 625 | 93.9   | 104.9 | 24.3  |
| 626 | -60.3  | 22.9  | -53.1 |
| 629 | 78.1   | -95.5 | -56.9 |
| 630 | 60.6   | 112.2 | 46.0  |
| 633 | -47.3  | 20.8  | 39.8  |
| 636 | 6.1    | 205.4 | 110.3 |
| 639 | 147.7  | 3.3   | 206.8 |
| 641 | 24.7   | 150.0 | 6.2   |

SDF-1α Placebo V1 V2

|     |        |        |
|-----|--------|--------|
| 601 | -7.2   | -69.1  |
| 605 | -41.7  | 13.0   |
| 606 | -17.5  | -32.7  |
| 607 | 19.5   | -8.6   |
| 609 | -5.2   | 37.7   |
| 613 | 56.1   | 97.4   |
| 614 | 176.8  | 166.4  |
| 615 | 66.4   | -48.6  |
| 616 | -30.7  | 15.4   |
| 619 | 34.7   | -53.4  |
| 621 | -12.5  | 8.2    |
| 622 | 43.4   | 82.6   |
| 627 | -6.8   | -136.4 |
| 628 | 81.2   | 96.1   |
| 631 | -179.4 | -36.2  |
| 632 | -21.8  | -86.6  |
| 634 | -46.3  | 75.7   |
| 635 | 222.2  | 107.1  |
| 637 | -35.5  | 55.8   |
| 638 | -161.5 | 98.7   |

IP-10 CPHPC V1 V2 V3

|     |        |       |       |
|-----|--------|-------|-------|
| 602 |        |       |       |
| 603 | -515.8 | -20.3 | 234.8 |
| 608 | -859.7 |       | 173.0 |
| 610 |        |       |       |
| 611 |        |       |       |

IP-10 Placebo V1 V2

|     |        |        |
|-----|--------|--------|
| 601 |        |        |
| 605 |        |        |
| 606 |        |        |
| 607 | -225.7 | 1009.8 |
| 609 | -18.5  | -691.8 |

|     |        |         |         |
|-----|--------|---------|---------|
| 612 |        |         |         |
| 617 |        |         |         |
| 618 |        |         |         |
| 620 |        |         |         |
| 623 |        |         |         |
| 624 |        |         |         |
| 625 |        |         |         |
| 626 |        |         |         |
| 629 |        |         |         |
| 630 | -97.7  | -422.9  | 1041.6  |
| 633 |        |         |         |
| 636 | -586.3 | -387.4  | 1471.9  |
| 639 | -16.6  | -642.2  | 7601.3  |
| 641 | -280.7 | 18307.2 | 26411.3 |

|     |        |         |
|-----|--------|---------|
| 613 |        |         |
| 614 | -252.4 | -714.3  |
| 615 | -742.5 | -724.6  |
| 616 |        |         |
| 619 |        |         |
| 621 |        |         |
| 622 |        |         |
| 627 | -791.8 | 960.2   |
| 628 | -445.8 | -1081.5 |
| 631 |        |         |
| 632 | -729.6 | -423.2  |
| 634 | 462.9  |         |
| 635 | 121.9  | -0.7    |
| 637 |        | -598.5  |
| 638 |        | -124.5  |

**IL-10 CPHPC**

|     | V1    | V2    | V3    |
|-----|-------|-------|-------|
| 602 | -44.1 | -53.7 | -13.4 |
| 603 | -32.2 | 1.3   | 10.3  |
| 608 | -28.2 | -19.0 | 6.6   |
| 610 | -22.7 | -41.4 | -7.1  |
| 611 | -25.5 | -32.3 | -22.3 |
| 612 | -13.0 | -42.6 | -30.7 |
| 617 | -47.4 | -52.0 | -9.9  |
| 618 | -41.7 | -4.7  | 33.9  |
| 620 | -18.3 | -62.2 | -25.5 |
| 623 | -47.5 | -34.2 | -1.3  |
| 624 | -23.5 | -21.7 | -1.0  |
| 625 | 4.5   | -31.0 | -15.7 |
| 626 | -52.0 | -30.0 | 7.0   |
| 629 | -10.5 | -40.6 | -17.2 |
| 630 | -0.1  | -17.7 | 16.7  |
| 633 | -40.1 | -20.7 | 15.6  |
| 636 | -17.6 | -10.7 | 22.9  |
| 639 | 6.4   | -54.7 | 53.2  |
| 641 | -14.1 | 9.2   | -6.9  |

**IL-10 Placebo**

|     | V1    | V2    |
|-----|-------|-------|
| 601 | -15.5 | -20.4 |
| 605 | -47.4 | -9.0  |
| 606 | -44.9 | -30.8 |
| 607 | -6.9  | -1.5  |
| 609 | -3.2  | -31.2 |
| 613 | -36.3 | -21.8 |
| 614 | -4.8  | -17.5 |
| 615 | -32.9 | -41.3 |
| 616 | -13.2 | -3.5  |
| 619 | -42.5 | -45.7 |
| 621 | -29.9 | -11.5 |
| 622 | -4.5  | -12.1 |
| 627 | -31.5 | -28.9 |
| 628 | -17.3 | -33.0 |
| 631 | -50.9 | -20.8 |
| 632 | -25.5 | -17.6 |
| 634 | -0.8  | -11.6 |
| 635 | 13.2  | -0.4  |
| 637 | -43.3 | -16.2 |
| 638 | -67.4 | -4.1  |

**IFN $\gamma$ /CPHPC**

|     | V1   | V2   | V3   |
|-----|------|------|------|
| 602 | -1.1 | -1.0 | 0.4  |
| 603 | -0.5 | 4.1  | 37.7 |
| 608 | -1.7 | 1.3  | 7.6  |
| 610 | -1.4 | 7.4  | -2.5 |
| 611 | -0.1 | 2.0  | 3.8  |
| 612 | -2.0 | -1.9 | 34.7 |
| 617 | -0.3 | -0.9 | 7.6  |
| 618 | -0.5 | 0.7  | 20.2 |
| 620 | -0.6 | -1.4 | -2.7 |
| 623 | -1.7 | -0.9 | 0.7  |
| 624 | 0.2  | 0.6  | 3.1  |
| 625 | 3.7  | 0.0  | 0.2  |
| 626 | -1.4 | -1.3 | 2.8  |

**IFN $\gamma$ /Placebo**

|     | V1      | V2       |
|-----|---------|----------|
| 601 | -2.8    | -2.7     |
| 605 | -4.6    | -0.5     |
| 606 | -0.6    | -2.3     |
| 607 | -0.9    | 3.8      |
| 609 | -0.1    | -1.5     |
| 613 | -8819.1 | -29053.9 |
| 614 | 1.4     | -2.0     |
| 615 | -0.8    | -0.9     |
| 616 | 0.2     | 0.7      |
| 619 | -0.2    | -0.4     |
| 621 | 6.3     | 0.3      |
| 622 | 12.0    | 6.2      |
| 627 | -8.1    | -2.2     |

|     |      |      |      |
|-----|------|------|------|
| 629 | 12.7 | -0.4 | -0.1 |
| 630 | 1.1  | -0.1 | 4.6  |
| 633 | -2.2 | -0.5 | 11.9 |
| 636 | 0.4  | 8.6  | 51.6 |
| 639 | 0.0  | -5.2 | 59.0 |
| 641 | -0.2 | 58.6 | 54.9 |

|     |      |      |
|-----|------|------|
| 628 | 1.9  | 1.1  |
| 631 | -0.2 | -0.1 |
| 632 | -1.9 | -0.8 |
| 634 | 65.3 | 5.0  |
| 635 | 1.9  | 1.8  |
| 637 | -3.7 | 9.1  |
| 638 | -5.7 | -0.4 |

**MIP-1 $\alpha$  CPHPC**

|     | V1      | V2      | V3      |
|-----|---------|---------|---------|
| 602 | 129.4   | 166.2   | 11.9    |
| 603 | 707.2   | 3501.8  | 5709.0  |
| 608 | 453.1   | 768.5   | 3648.7  |
| 610 | -59.9   | 41984.2 | 25659.3 |
| 611 | 358.7   | 21398.5 | 12941.3 |
| 612 | 10327.0 | 3491.4  | 8442.1  |
| 617 | 968.0   | 15348.7 | 18041.4 |
| 618 | 6651.4  | 55.5    | 1276.2  |
| 620 | 1126.4  | 300.3   | 109.3   |
| 623 | 15619.4 | 23495.3 | 28540.6 |
| 624 | 6173.2  | 3349.5  | 1585.5  |
| 625 | 23705.1 | 26064.6 | 2816.0  |
| 626 | 181.6   | 203.7   | 74.3    |
| 629 | 10971.9 | 91.1    | 190.5   |
| 630 | 28673.0 | 19371.0 | 18511.3 |
| 633 | 5190.1  | 394.1   | 164.0   |
| 636 | 2673.1  | 14714.2 | 10308.6 |
| 639 | 67903.1 | 33221.1 | 21043.8 |
| 641 | 23323.7 | 10957.4 | 11035.3 |

**MIP-1 $\alpha$  Placebo**

|     | V1      | V2      |
|-----|---------|---------|
| 601 | 13.3    | -4.9    |
| 605 | 11109.8 | 5164.6  |
| 606 | 273.9   | -6.2    |
| 607 | 49314.3 | 3908.2  |
| 609 | 1233.6  | 4345.8  |
| 613 | 8929.8  | 29120.3 |
| 614 | 28483.0 | 27982.8 |
| 615 | 59793.9 | 37132.3 |
| 616 | 726.2   | 949.1   |
| 619 | 14135.0 | 510.3   |
| 621 | 378.6   | 531.0   |
| 622 | 1637.3  | 3923.8  |
| 627 | 20276.0 | 3577.1  |
| 628 | 27809.1 | 28519.4 |
| 631 | 31.6    | 2319.6  |
| 632 | 15005.4 | 3160.1  |
| 634 | 14755.3 | 16228.9 |
| 635 | 7956.5  | 1351.7  |
| 637 | 2276.3  | 1714.1  |
| 638 | 137.3   | 21798.5 |

**RANTES CPHPC**

|     | V1    | V2    | V3     |
|-----|-------|-------|--------|
| 602 | -30.2 | 51.8  | 5.3    |
| 603 | 35.2  | 193.4 | 111.4  |
| 608 | 24.6  | 104.4 | 295.1  |
| 610 | 106.3 | 216.3 | 72.5   |
| 611 | 6.9   | 270.5 | 174.2  |
| 612 | 250.6 | 59.0  | 138.3  |
| 617 | 28.4  | 136.2 | 135.2  |
| 618 | 314.4 | 9.6   | 89.2   |
| 620 | 92.5  | 34.0  | 4.0    |
| 623 | 160.6 | 186.7 | 1659.3 |
| 624 | 87.7  | 39.8  | 38.1   |
| 625 | 298.3 | 660.1 | 119.4  |
| 626 | 13.7  | 1.7   | 5.1    |
| 629 | 234.7 | 45.2  | 55.0   |
| 630 | 218.6 | 204.1 | 181.9  |
| 633 | 162.9 | 61.7  | 10.5   |
| 636 | 22.9  | 213.3 | 244.4  |
| 639 | 673.7 | 342.6 | 705.1  |
| 641 | 230.8 | 329.5 | 256.2  |

**RANTES Placebo**

|     | V1    | V2     |
|-----|-------|--------|
| 601 | 20.9  | 15.7   |
| 605 | 49.4  | 138.6  |
| 606 | 14.4  | 5.6    |
| 607 | 771.6 | 215.9  |
| 609 | 106.3 | 216.3  |
| 613 | 62.6  | 397.3  |
| 614 | 649.3 | 1420.8 |
| 615 | 214.5 | 72.5   |
| 616 | 9.9   | 34.1   |
| 619 | 278.7 | 89.8   |
| 621 | 42.1  | 60.9   |
| 622 | 16.8  | 28.6   |
| 627 | 147.0 | 7.9    |
| 628 | 221.5 | 255.9  |
| 631 | -2.8  | 14.2   |
| 632 | 152.8 | 57.4   |
| 634 | 120.1 | 88.2   |
| 635 | 208.4 | 132.4  |
| 637 | 27.9  | 44.7   |
| 638 | -57.1 | 292.1  |

| MIP-1 $\beta$ CPHPC | V1     | V2     | V3     |
|---------------------|--------|--------|--------|
| 602                 | 108.1  | 95.0   | 7.9    |
| 603                 | 478.5  | 1495.1 | 2178.1 |
| 608                 | 86.5   | 210.3  | 754.8  |
| 610                 | -301.7 | 2052.2 | 3394.5 |
| 611                 | 468.8  | 2713.8 | 1821.5 |
| 612                 | 338.6  | 540.3  | 590.3  |
| 617                 | 270.8  | 1457.9 | -991.8 |
| 618                 | 2677.0 | 54.0   | 1098.3 |
| 620                 | 121.5  | 104.1  | -22.6  |
| 623                 | 2694.3 | 1838.4 | 2153.1 |
| 624                 | 286.0  | 347.6  | 76.4   |
| 625                 | 977.8  | 2660.7 | 1256.1 |
| 626                 | 170.7  | 286.8  | 246.0  |
| 629                 | 1985.2 | -15.3  | 71.5   |
| 630                 | 2867.2 | 2269.8 | -101.3 |
| 633                 | 1867.8 | 264.9  | 449.5  |
| 636                 | 1571.9 | 2894.2 | 2002.0 |
| 639                 | 5919.1 | 5274.9 | 4725.5 |
| 641                 | 2323.6 | 2566.8 | 2635.7 |

| MIP-1 $\beta$ Placebo | V1     | V2     |
|-----------------------|--------|--------|
| 601                   | -41.3  | -60.2  |
| 605                   | -13.6  | 3337.2 |
| 606                   | 262.6  | -42.0  |
| 607                   | 276.8  | 1128.1 |
| 609                   | 533.8  | 1059.2 |
| 613                   | 2361.5 | 4371.2 |
| 614                   | 5663.5 | 6269.3 |
| 615                   | 1322.7 | 627.2  |
| 616                   | 353.0  | 429.4  |
| 619                   | 1248.0 | 57.1   |
| 621                   | 425.0  | 514.6  |
| 622                   | 542.8  | 1027.6 |
| 627                   | 629.9  | 529.8  |
| 628                   | 4110.4 | 5589.9 |
| 631                   | -149.3 | 902.0  |
| 632                   | 1245.8 | 671.6  |
| 634                   | 1164.2 | 2947.0 |
| 635                   | 3711.5 | 796.4  |
| 637                   | 2077.4 | 1620.8 |
| 638                   | 173.2  | 2519.6 |

| IL-4 CPHPC | V1    | V2    | V3    |
|------------|-------|-------|-------|
| 602        | -17.7 | -10.5 | 3.7   |
| 603        | 15.4  | 28.1  | 24.9  |
| 608        | 0.0   | 7.7   | 25.9  |
| 610        | -49.5 | 15.2  | 51.2  |
| 611        | 0.0   | 19.7  | 21.4  |
| 612        | 0.0   | 6.5   | 10.3  |
| 617        | -3.8  | 7.4   | 3.2   |
| 618        | 27.7  | -11.2 | 41.5  |
| 620        | -4.1  | -21.3 | -12.9 |
| 623        | 17.3  | 17.3  | 91.0  |
| 624        | 3.8   | 15.9  | 5.5   |
| 625        | 16.8  | 36.9  | 11.8  |
| 626        | -9.4  | 0.0   | 15.9  |
| 629        | 32.8  | -24.3 | 3.8   |
| 630        | 23.2  | 27.7  | 24.0  |
| 633        | 21.5  | 0.0   | 13.5  |
| 636        | 19.1  | 39.7  | 37.3  |
| 639        | 70.4  | 25.4  | 83.7  |
| 641        | 37.2  | 38.9  | 7.7   |

| IL-4 Placebo | V1    | V2   |
|--------------|-------|------|
| 601          | 3.2   | -9.6 |
| 605          | -2.6  | 31.0 |
| 606          | 6.6   | -8.8 |
| 607          | 29.9  | 19.2 |
| 609          | 19.1  | 29.9 |
| 613          | 37.5  | 49.8 |
| 614          | 65.6  | 73.0 |
| 615          | 22.3  | 8.0  |
| 616          | 0.0   | 0.0  |
| 619          | 31.0  | -4.7 |
| 621          | -3.8  | 8.0  |
| 622          | 14.9  | 11.3 |
| 627          | 12.3  | 3.0  |
| 628          | 29.2  | 29.2 |
| 631          | -24.5 | 6.4  |
| 632          | 9.7   | 1.8  |
| 634          | 24.2  | 34.3 |
| 635          | 42.7  | 9.7  |
| 637          | 9.0   | 21.9 |
| 638          | -35.8 | 26.0 |

| IL-2 CPHPC | V1     | V2     | V3    |
|------------|--------|--------|-------|
| 602        | -155.7 | -117.6 | -26.6 |
| 603        | 37.4   | 189.6  | 222.8 |
| 608        | -43.5  | 77.5   | 270.3 |
| 610        | -397.2 | 46.6   | 345.0 |
| 611        | 18.7   | 175.1  | 137.2 |
| 612        | 99.2   | -57.8  | 76.4  |
| 617        | -62.1  | 57.4   | 60.9  |

| IL-2 Placebo | V1    | V2    |
|--------------|-------|-------|
| 601          | -31.8 | -46.9 |
| 605          | -82.2 | 115.9 |
| 606          | -27.4 | -97.5 |
| 607          | 204.5 | 155.3 |
| 609          | 118.4 | 100.5 |
| 613          | 262.8 | 501.8 |
| 614          | 532.1 | 545.4 |

|     |        |        |       |
|-----|--------|--------|-------|
| 618 | 165.7  | 35.6   | 308.8 |
| 620 | 35.5   | -179.6 | -74.4 |
| 623 | 94.1   | 151.2  | 780.9 |
| 624 | 49.6   | 122.2  | 109.7 |
| 625 | 291.5  | 354.0  | 114.3 |
| 626 | -178.4 | -30.5  | -14.4 |
| 629 | 254.1  | -151.2 | -41.6 |
| 630 | 326.6  | 282.0  | 205.6 |
| 633 | -7.4   | -10.2  | 45.6  |
| 636 | 68.1   | 309.5  | 384.1 |
| 639 | 645.1  | 501.7  | 872.6 |
| 641 | 270.2  | 417.5  | 422.2 |

|     |        |       |
|-----|--------|-------|
| 615 | 163.1  | 57.3  |
| 616 | -50.2  | 97.8  |
| 619 | 115.6  | -93.1 |
| 621 | 69.0   | 27.5  |
| 622 | 188.6  | 241.1 |
| 627 | 16.7   | -51.8 |
| 628 | 239.2  | 256.3 |
| 631 | -210.2 | 23.3  |
| 632 | 69.5   | -34.2 |
| 634 | 190.9  | 260.5 |
| 635 | 453.8  | 158.4 |
| 637 | 46.2   | 169.6 |
| 638 | -105.0 | 255.3 |

**IL-13 CPHPC**

|     | V1     | V2     | V3     |
|-----|--------|--------|--------|
| 602 | -63.5  | -63.5  | 0.0    |
| 603 | 51.9   | 239.6  | 319.2  |
| 608 | 0.0    | -22.0  | 168.0  |
| 610 | -75.6  | 262.7  | 460.6  |
| 611 | 119.7  | 302.3  | 152.8  |
| 612 | 0.0    | 109.7  | 86.7   |
| 617 | -45.3  | 216.1  | -168.6 |
| 618 | 468.4  | 0.0    | 229.2  |
| 620 | 0.0    | 65.3   | -65.3  |
| 623 | 258.7  | 238.4  | 467.8  |
| 624 | 83.9   | -55.4  | 0.0    |
| 625 | 222.9  | 317.9  | 0.0    |
| 626 | -143.8 | 0.0    | 0.0    |
| 629 | 227.2  | 0.0    | 47.0   |
| 630 | 373.8  | 245.3  | 69.7   |
| 633 | 192.0  | 72.6   | 0.0    |
| 636 | 72.6   | 384.0  | 296.7  |
| 639 | 671.3  | -155.5 | 704.9  |
| 641 | 290.2  | 420.3  | -285.2 |

**IL-13 Placebo**

|     | V1     | V2    |
|-----|--------|-------|
| 601 | -11.6  | 0.0   |
| 605 | -149.5 | 426.6 |
| 606 | 153.8  | -63.5 |
| 607 | 142.8  | 173.0 |
| 609 | 109.7  | 0.0   |
| 613 | 389.9  | 506.0 |
| 614 | 896.8  | 850.2 |
| 615 | 124.1  | 38.5  |
| 616 | 0.0    | 83.7  |
| 619 | 216.1  | 0.0   |
| 621 | 55.4   | 110.8 |
| 622 | 171.0  | 120.6 |
| 627 | 143.8  | 30.9  |
| 628 | 479.4  | 719.7 |
| 631 | 0.0    | 0.0   |
| 632 | 176.4  | 145.2 |
| 634 | 126.0  | 327.0 |
| 635 | 413.1  | 72.6  |
| 637 | 135.0  | 327.0 |
| 638 | -808.8 | 342.3 |

**MIG CPHPC**

|     | V1      | V2     | V3      |
|-----|---------|--------|---------|
| 602 | -50.3   | -49.9  | 0.0     |
| 603 | -12.6   | 84.0   | 488.7   |
| 608 | -88.0   | 101.5  | 437.7   |
| 610 | -97.4   | 38.6   | 27.4    |
| 611 | -42.0   | -384.5 | 432.9   |
| 612 | -71.7   | -140.6 | 1168.1  |
| 617 | -87.2   | -158.1 | 190.5   |
| 618 | -227.0  | 529.6  | 12032.5 |
| 620 | -1124.0 | -875.2 | -1796.4 |
| 623 | -157.8  | 14.3   | 172.2   |
| 624 | 27.3    | 28.2   | 191.2   |
| 625 | 254.9   | 13.9   | -224.1  |
| 626 | -269.0  | -737.2 | 3116.2  |
| 629 | 109.6   | -84.5  | 107.4   |
| 630 | 119.5   | -35.4  | 901.0   |

**MIG Placebo**

|     | V1      | V2      |
|-----|---------|---------|
| 601 | -317.0  | -941.5  |
| 605 | -277.5  | -34.0   |
| 606 | -314.4  | -428.2  |
| 607 | 21.7    | 232.7   |
| 609 | 49.8    | -111.7  |
| 613 | -625.0  | -1879.3 |
| 614 | 137.3   | 78.8    |
| 615 | -31.4   | -33.1   |
| 616 | 17.0    | 190.9   |
| 619 | -16.1   | -52.2   |
| 621 | -1121.0 | 0.0     |
| 622 | 1939.9  | 131.1   |
| 627 | -27.7   | -1083.3 |
| 628 | -29.0   | -109.7  |
| 631 | -18.7   | -51.2   |

|            |        |        |        |
|------------|--------|--------|--------|
| <b>633</b> | -367.0 | -88.6  | 1259.0 |
| <b>636</b> | -286.6 | 355.6  | 2057.4 |
| <b>639</b> | 178.1  | 164.2  | 3023.4 |
| <b>641</b> | 75.5   | 2136.4 | 2204.3 |

|            |        |       |
|------------|--------|-------|
| <b>632</b> | -43.8  | -36.5 |
| <b>634</b> | 3158.4 | 282.6 |
| <b>635</b> | 200.2  | 71.4  |
| <b>637</b> | -633.4 | 255.3 |
| <b>638</b> | 223.5  | 133.9 |

| <b>Granzyme B CPHI</b> | <b>V1</b> | <b>V2</b> | <b>V3</b> |
|------------------------|-----------|-----------|-----------|
| <b>602</b>             | 9.1       | -25.1     | 71.0      |
| <b>603</b>             | -37.3     | 382.5     | 936.5     |
| <b>608</b>             | -132.3    | -118.8    | 408.6     |
| <b>610</b>             | -272.0    | 246.9     | -422.5    |
| <b>611</b>             | 11.2      | -59.7     | 193.7     |
| <b>612</b>             | -313.9    | -76.3     | 459.7     |
| <b>617</b>             | -137.1    | -102.9    | 143.3     |
| <b>618</b>             | 9.1       | 44.5      | 374.9     |
| <b>620</b>             | -0.3      | -106.5    | -60.7     |
| <b>623</b>             | -53.5     | -90.3     | 103.5     |
| <b>624</b>             | -76.2     | -30.2     | 89.8      |
| <b>625</b>             | 190.1     | 42.6      | 59.9      |
| <b>626</b>             | -391.5    | -61.3     | 369.6     |
| <b>629</b>             | 612.5     | -9.7      | 41.2      |
| <b>630</b>             | 339.2     | 31.9      | 1175.9    |
| <b>633</b>             | -232.9    | -31.9     | 225.6     |
| <b>636</b>             | 36.8      | 258.5     | 929.0     |
| <b>639</b>             | -0.7      | -125.3    | 1861.2    |
| <b>641</b>             | -4.7      | 1126.2    | 980.1     |

| <b>Granzyme B Place</b> | <b>V1</b> | <b>V2</b> |
|-------------------------|-----------|-----------|
| <b>601</b>              | -88.5     | 8.0       |
| <b>605</b>              | -474.4    | -72.2     |
| <b>606</b>              | 12.2      | -33.7     |
| <b>607</b>              | 39.9      | 298.0     |
| <b>609</b>              | -123.6    | 77.9      |
| <b>613</b>              | 65.2      | 242.8     |
| <b>614</b>              | 120.6     | 16.8      |
| <b>615</b>              | -68.3     | -67.4     |
| <b>616</b>              | 17.9      | 46.3      |
| <b>619</b>              | -60.9     | -8.4      |
| <b>621</b>              | 51.3      | -41.7     |
| <b>622</b>              | 411.4     | 187.3     |
| <b>627</b>              | -150.1    | -78.3     |
| <b>628</b>              | 373.7     | 307.1     |
| <b>631</b>              | -90.9     | -1.2      |
| <b>632</b>              | -1.1      | -55.8     |
| <b>634</b>              | 102.2     | 231.5     |
| <b>635</b>              | 108.0     | -19.4     |
| <b>637</b>              | -6.2      | 738.1     |
| <b>638</b>              | -304.8    | -16.9     |

**V3**

|       |
|-------|
| 25.0  |
| 129.8 |
| 1.1   |
| 30.4  |
| 12.5  |
| 172.2 |
| 92.2  |
| 61.4  |
| 8.5   |
| -14.6 |
| 8.1   |
| 18.1  |
| 25.5  |
| 56.5  |
| -2.8  |
| 36.5  |
| 59.0  |
| 33.4  |
| 133.1 |
| 144.5 |

**V3**

|       |
|-------|
| 55.3  |
| 29.9  |
| 15.7  |
| -1.9  |
| 71.8  |
| 19.9  |
| 109.8 |
| 53.4  |
| 67.0  |
| -69.6 |
| 26.1  |
| 58.2  |
| -58.5 |
| -60.5 |
| 36.3  |
| 38.1  |
| 0.0   |
| 167.1 |
| 89.2  |
| 124.2 |

**V3**

|        |
|--------|
| -673.1 |
| 92.6   |

|       |
|-------|
| 72.8  |
| 198.1 |

|        |
|--------|
| -267.8 |
| 406.8  |

|        |
|--------|
| 2042.9 |
| 2283.9 |
| 1539.5 |
| 336.1  |
| 4586.9 |

**V3**

|       |
|-------|
| -10.2 |
| 7.5   |
| -12.9 |
| -2    |
| 11.5  |
| -60.4 |
| 9.6   |
| 0.9   |
| 40.0  |
| -19.9 |
| -21.8 |
| -26.7 |
| -14.9 |
| 22.7  |
| 14.0  |
| 10.1  |
| 20.5  |
| 13.9  |
| -10.9 |
| 30.7  |

**V3**

|          |
|----------|
| 7.3      |
| 21.0     |
| 1.1      |
| 3.7      |
| 1.4      |
| -31759.7 |
| 2.3      |
| 41.5     |
| 1.7      |
| -0.7     |
| 2.6      |
| 4.1      |
| 6.3      |

|      |
|------|
| 36.4 |
| 5.1  |
| 5.1  |
| 79.2 |
| 10.5 |
| 4.1  |
| 13.7 |

**V3**

|          |
|----------|
| 943.8    |
| 5627.4   |
| 316.1    |
| 8479.7   |
| 3067.7   |
| 31452.0  |
| 242642.3 |
| 10091.2  |
| 264.7    |
| 189.5    |
| 15.5     |
| 6084.1   |
| 16885.3  |
| 13719.4  |
| 26.8     |
| 7636.3   |
| 13742.5  |
| 4172.5   |
| 911.7    |
| 87594.3  |

**V3**

|       |
|-------|
| 124.8 |
| 52.8  |
| 18.6  |
| 744.3 |
| 72.5  |
| 288.7 |
| 448.1 |
| 207.7 |
| 17.9  |
| 24.1  |
| -5.0  |
| 67.2  |
| 116.3 |
| 132.0 |
| 5.9   |
| 159.8 |
| 109.0 |
| 178.2 |
| 56.0  |
| 676.5 |

**V3**

|        |
|--------|
| 1242.3 |
| 2570.7 |
| 176.1  |
| 2245.8 |
| 774.3  |
| 3079.9 |
| 3242.5 |
| 705.3  |
| 255.9  |
| -14.8  |
| 71.5   |
| 1280.6 |
| 1182.6 |
| -59.7  |
| 84.5   |
| 1262.7 |
| 1036.2 |
| 2366.0 |
| 1732.9 |
| 4617.0 |

**V3**

|      |
|------|
| 18.3 |
| 14.7 |
| 9.2  |
| 27.2 |
| 24.2 |
| 27.0 |
| 53.4 |
| 28.2 |
| 19.1 |
| 0.0  |
| -4.1 |
| 14.5 |
| 16.3 |
| 22.2 |
| 10.7 |
| 29.1 |
| 18.5 |
| 30.1 |
| 38.5 |
| 64.3 |

**V3**

|       |
|-------|
| 151.6 |
| 153.5 |
| 32.9  |
| 332.7 |
| 214.9 |
| 124.6 |
| 505.3 |

|       |
|-------|
| 252.0 |
| 230.7 |
| -27.1 |
| -21.9 |
| 87.5  |
| 146.6 |
| 236.7 |
| 8.7   |
| 208.0 |
| 212.0 |
| 292.2 |
| 234.7 |
| 660.9 |

**V3**

|        |
|--------|
| 98.3   |
| 211.7  |
| 63.5   |
| 205.9  |
| 144.6  |
| 400.9  |
| 611.4  |
| 124.1  |
| 83.7   |
| -167.5 |
| -185.9 |
| 136.4  |
| -102.8 |
| -2.8   |
| -84.1  |
| 197.5  |
| 270.1  |
| 207.6  |
| 245.4  |
| 715.6  |

**V3**

|         |
|---------|
| 778.0   |
| 2137.3  |
| 41.5    |
| 95.5    |
| 75.2    |
| -2063.2 |
| 171.4   |
| 909.8   |
| 1996.7  |
| 288.9   |
| 131.9   |
| -371.9  |
| 85.1    |
| 1213.2  |
| 5494.3  |

|        |
|--------|
| 760.2  |
| 4426.7 |
| 1937.8 |
| 342.1  |
| 3046.9 |

**V3**

|        |
|--------|
| 673.0  |
| 541.9  |
| 111.1  |
| 310.2  |
| 143.8  |
| 409.7  |
| 90.6   |
| 1032.6 |
| 140.1  |
| 41.2   |
| 112.0  |
| 177.6  |
| 203.1  |
| 1461.3 |
| 64.7   |
| 94.2   |
| 720.4  |
| 257.2  |
| 684.1  |
| 496.3  |
