# Supplementary material for: Randomized phase I trial HIV-CORE 003: Depletion of serum amyloid P component and immunogenicity of DNA vaccination against HIV-1
Source: PubMed Central journal article supplement (PMC5957335; doi:10.1371/journal.pone.0197299), 2018-05-17
Supplement: pone.0197299.s007.pdf [file pone.0197299.s007.pdf]

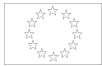**Clinical trial results:**

**A randomised double-blind, placebo-controlled phase I/IIa trial to investigate the effect of depletion of serum amyloid P component (SAP) on the immune response to DNA vaccination in healthy male volunteers.**

**Summary**

|                          |                  |
|--------------------------|------------------|
| EudraCT number           | 2012-004052-11   |
| Trial protocol           |                  |
| Global end of trial date | 01 February 2016 |

**Results information**

|                                |              |
|--------------------------------|--------------|
| Result version number          | v1 (current) |
| This version publication date  |              |
| First version publication date |              |

**Trial information****Trial identification**

|                       |         |
|-----------------------|---------|
| Sponsor protocol code | 11/0455 |
|-----------------------|---------|

**Additional study identifiers**

|                                    |             |
|------------------------------------|-------------|
| ISRCTN number                      | -           |
| ClinicalTrials.gov id (NCT number) | NCT02425241 |
| WHO universal trial number (UTN)   | -           |

Notes:

**Sponsors**

|                              |                                                                                                                   |
|------------------------------|-------------------------------------------------------------------------------------------------------------------|
| Sponsor organisation name    | University College London                                                                                         |
| Sponsor organisation address | Gower Street, London, United Kingdom,                                                                             |
| Public contact               | Dr Julian Gillmore, National Amyloidosis Centre, University College London, 0044 2074332726, j.gillmore@ucl.ac.uk |
| Scientific contact           | Dr Julian Gillmore, National Amyloidosis Centre, University College London, 0044 2074332726, j.gillmore@ucl.ac.uk |

Notes:

**Paediatric regulatory details**

|                                                                      |    |
|----------------------------------------------------------------------|----|
| Is trial part of an agreed paediatric investigation plan (PIP)       | No |
| Does article 45 of REGULATION (EC) No 1901/2006 apply to this trial? | No |
| Does article 46 of REGULATION (EC) No 1901/2006 apply to this trial? | No |

Notes:

**Results analysis stage**

|                                |                |
|--------------------------------|----------------|
| Analysis stage                 | Final          |
| Date of interim/final analysis | 29 August 2017 |

|                                                      |                  |
|------------------------------------------------------|------------------|
| Is this the analysis of the primary completion data? | Yes              |
| Primary completion date                              | 01 February 2016 |
| Global end of trial reached?                         | Yes              |
| Global end of trial date                             | 01 February 2016 |
| Was the trial ended prematurely?                     | No               |

Notes:

## General information about the trial

Main objective of the trial:

This is a proof-of-concept study to determine whether depleting the normal plasma protein serum amyloid P component (SAP) will enhance the body's immune response to DNA vaccination.

Protection of trial subjects:

1. Participants had to undergo testing for HIV, hepatitis and syphilis as part of screening. They were counselled about this prior to testing, and would have been referred for appropriate followup and treatment if they tested positive.
2. Any vaccination has the potential to cause the following: Redness, pain, swelling, itching, bruising, a warm feeling; 'flu like symptoms such as fever, chills, muscle aches and pains, headaches, nausea, dizziness and fatigue; Allergic reactions such as itchy rash, low blood pressure, sudden body swelling, serious breathing difficulty; A temporary ache around the injection site. Subjects were observed in clinic for two hours after vaccination and received a telephone call three days later to make sure they were well. Subjects were advised on how to manage these symptoms at home and were given 24 hour contact cards.
3. This was a study in healthy volunteers with no direct benefit from participation. To address this, participants will be compensated for their time and effort.
4. There could have been some discomfort from study procedures, such as venepuncture, intramuscular injection and intravenous cannulation. Every effort was made to ensure the volunteers were as comfortable as possible throughout their participation in the study.
5. Subjects were dosed within an inpatient facility with overnight monitoring. The first two subjects were randomised one to each arm and were dosed one at a time; the safety data from these two subjects were reviewed by the IDMC before any further subjects were dosed.
6. Participants underwent testing for HIV, hepatitis and syphilis as part of screening. They were counselled about this prior to testing, and were assured that they would be referred for appropriate follow up and treatment should a test be positive.

Background therapy:

None

Evidence for comparator:

Placebo comparator was used to determine whether SAP depletion had any effect on the response to DNA vaccination.

|                                                           |               |
|-----------------------------------------------------------|---------------|
| Actual start date of recruitment                          | 22 April 2013 |
| Long term follow-up planned                               | No            |
| Independent data monitoring committee (IDMC) involvement? | Yes           |

Notes:

## Population of trial subjects

### Subjects enrolled per country

|                                      |                    |
|--------------------------------------|--------------------|
| Country: Number of subjects enrolled | United Kingdom: 41 |
| Worldwide total number of subjects   | 41                 |
| EEA total number of subjects         | 41                 |

Notes:

## Subjects enrolled per age group

|                                           |    |
|-------------------------------------------|----|
| In utero                                  | 0  |
| Preterm newborn - gestational age < 37 wk | 0  |
| Newborns (0-27 days)                      | 0  |
| Infants and toddlers (28 days-23 months)  | 0  |
| Children (2-11 years)                     | 0  |
| Adolescents (12-17 years)                 | 0  |
| Adults (18-64 years)                      | 41 |
| From 65 to 84 years                       | 0  |
| 85 years and over                         | 0  |

## Subject disposition

### Recruitment

Recruitment details:

Participants were recruited via advertisements - emails, posters and newspaper adverts.

### Pre-assignment

Screening details:

Healthy, HIV negative men aged 18 to 50 were invited to contact the research team if they wished to participate in the study. After informed consent volunteers were screened for eligibility against the inclusion and exclusion criteria set out in the study protocol.

### Period 1

|                              |                         |
|------------------------------|-------------------------|
| Period 1 title               | Baseline                |
| Is this the baseline period? | Yes                     |
| Allocation method            | Randomised - controlled |
| Blinding used                | Double blind            |
| Roles blinded                | Subject, Investigator   |

Blinding implementation details:

An online randomisation service was used. Only the pharmacists were unblind to the allocation. The IMP and placebo were identical and so there was no danger of study staff or participants being unblinded. Laboratory tests of pharmacodynamic (PD) effect were only carried out at the end of the trial, after the official unblinding, i.e. PD samples taken throughout the study were frozen and stored for analysis at the end of the study.

### Arms

|                                        |                                                                                       |
|----------------------------------------|---------------------------------------------------------------------------------------|
| Are arms mutually exclusive?           | Yes                                                                                   |
| <b>Arm title</b>                       | CPHPC                                                                                 |
| Arm description: -                     |                                                                                       |
| Arm type                               | Experimental                                                                          |
| Investigational medicinal product name | (R)-1-[6-[(R)-2-carboxy-pyrrolidin-1-yl]-6-oxo-hexanoyl]pyrrolidine-2-carboxylic acid |
| Investigational medicinal product code |                                                                                       |
| Other name                             | CPHPC                                                                                 |
| Pharmaceutical forms                   | Concentrate for solution for infusion                                                 |
| Routes of administration               | Intravenous drip use                                                                  |

Dosage and administration details:

40 mg/hour CPHPC (20 mg/mL solution) infused intravenously over 26 hours.

|                                        |                       |
|----------------------------------------|-----------------------|
| <b>Arm title</b>                       | Placebo               |
| Arm description: -                     |                       |
| Arm type                               | Placebo               |
| Investigational medicinal product name | 0.9% sodium chloride  |
| Investigational medicinal product code |                       |
| Other name                             |                       |
| Pharmaceutical forms                   | Solution for infusion |
| Routes of administration               | Intravenous use       |

Dosage and administration details:

2 mL/hr by intravenous infusion

| <b>Number of subjects in period 1</b>       | CPHPC                                                    | Placebo |  |
|---------------------------------------------|----------------------------------------------------------|---------|--|
| Started                                     | 20                                                       | 20      |  |
| Completed                                   | 20                                                       | 20      |  |
| Not completed                               | 1                                                        | 0       |  |
| Consent withdrawn by subject                | 1                                                        | -       |  |
| Joined                                      | 1                                                        | 0       |  |
| Late recruitment<br>Late recruitment reason | 1<br>replacement of<br>volunteer who<br>withdrew consent | -       |  |

## Period 2

|                                                              |                         |
|--------------------------------------------------------------|-------------------------|
| Period 2 title                                               | Treatment               |
| Is this the baseline period?                                 | No                      |
| Allocation method                                            | Randomised - controlled |
| Blinding used                                                | Double blind            |
| Roles blinded                                                | Subject, Investigator   |
| Blinding implementation details:<br>As per previous section. |                         |

## Arms

|                                                                                                                 |                                                                                       |
|-----------------------------------------------------------------------------------------------------------------|---------------------------------------------------------------------------------------|
| Are arms mutually exclusive?                                                                                    | Yes                                                                                   |
| <b>Arm title</b>                                                                                                | CPHPC                                                                                 |
| Arm description:<br>Receiving active IMP, CPHPC, plus vaccines                                                  |                                                                                       |
| Arm type                                                                                                        | Experimental                                                                          |
| Investigational medicinal product name                                                                          | (R)-1-[6-[(R)-2-carboxy-pyrrolidin-1-yl]-6-oxo-hexanoyl]pyrrolidine-2-carboxylic acid |
| Investigational medicinal product code                                                                          |                                                                                       |
| Other name                                                                                                      | CPHPC                                                                                 |
| Pharmaceutical forms                                                                                            | Concentrate for solution for infusion                                                 |
| Routes of administration                                                                                        | Intravenous drip use                                                                  |
| Dosage and administration details:<br>40 mg/hour CPHPC (20 mg/mL solution) infused intravenously over 26 hours. |                                                                                       |
| Investigational medicinal product name                                                                          | pSG2.HIVconsv                                                                         |
| Investigational medicinal product code                                                                          |                                                                                       |
| Other name                                                                                                      |                                                                                       |
| Pharmaceutical forms                                                                                            | Solution for injection                                                                |
| Routes of administration                                                                                        | Intramuscular use                                                                     |
| Dosage and administration details:<br>909 µL (4.0 mg) given by intramuscular injection                          |                                                                                       |
| Investigational medicinal product name                                                                          | ChAdV63.HIVconsv                                                                      |
| Investigational medicinal product code                                                                          |                                                                                       |
| Other name                                                                                                      |                                                                                       |
| Pharmaceutical forms                                                                                            | Solution for injection                                                                |
| Routes of administration                                                                                        | Intramuscular use                                                                     |
| Dosage and administration details:<br>1.2x10 <sup>9</sup> IU (0.32 ml) given by intramuscular injection         |                                                                                       |

|                                        |                        |
|----------------------------------------|------------------------|
| Investigational medicinal product name | MVA.HIVconsv           |
| Investigational medicinal product code |                        |
| Other name                             |                        |
| Pharmaceutical forms                   | Solution for injection |
| Routes of administration               | Intramuscular use      |

Dosage and administration details:  
2.0 x 10<sup>8</sup> pfu (0.23ml) given by intramuscular injection

|                  |         |
|------------------|---------|
| <b>Arm title</b> | Placebo |
|------------------|---------|

Arm description:  
Control arm receiving normal saline infusion plus vaccines

|                                        |                       |
|----------------------------------------|-----------------------|
| Arm type                               | Placebo               |
| Investigational medicinal product name | 0.9% sodium chloride  |
| Investigational medicinal product code |                       |
| Other name                             |                       |
| Pharmaceutical forms                   | Solution for infusion |
| Routes of administration               | Intravenous use       |

Dosage and administration details:  
2 mL/hr by intravenous infusion

|                                        |                        |
|----------------------------------------|------------------------|
| Investigational medicinal product name | pSG2.HIVconsv          |
| Investigational medicinal product code |                        |
| Other name                             |                        |
| Pharmaceutical forms                   | Solution for injection |
| Routes of administration               | Intramuscular use      |

Dosage and administration details:  
909 µL (4.0 mg) given by intramuscular injection

|                                        |                        |
|----------------------------------------|------------------------|
| Investigational medicinal product name | ChAdV63.HIVconsv       |
| Investigational medicinal product code |                        |
| Other name                             |                        |
| Pharmaceutical forms                   | Solution for injection |
| Routes of administration               | Intramuscular use      |

Dosage and administration details:  
1.2x10<sup>9</sup> IU (0.32 ml) given by intramuscular injection

|                                        |                        |
|----------------------------------------|------------------------|
| Investigational medicinal product name | MVA.HIVconsv           |
| Investigational medicinal product code |                        |
| Other name                             |                        |
| Pharmaceutical forms                   | Solution for injection |
| Routes of administration               | Intramuscular use      |

Dosage and administration details:  
2.0 x 10<sup>8</sup> pfu (0.23ml) given by intramuscular injection

| <b>Number of subjects in period 2</b> | CPHPC | Placebo |  |
|---------------------------------------|-------|---------|--|
| Started                               | 20    | 20      |  |
| Completed                             | 19    | 20      |  |
| Not completed                         | 1     | 0       |  |
| Consent withdrawn by subject          | 1     | -       |  |



## Baseline characteristics

---

### Reporting groups

|                       |          |
|-----------------------|----------|
| Reporting group title | Baseline |
|-----------------------|----------|

Reporting group description:

Whole cohort

---

| <b>Reporting group values</b> | Baseline | Total |  |
|-------------------------------|----------|-------|--|
| Number of subjects            | 41       | 41    |  |
| Age categorical               |          |       |  |
| Adult males aged 18 to 40     |          |       |  |
| Units: Subjects               |          |       |  |
| Adults (18-64 years)          | 41       | 41    |  |
| Gender categorical            |          |       |  |
| Males only                    |          |       |  |
| Units: Subjects               |          |       |  |
| Male                          | 41       | 41    |  |
| HIV status                    |          |       |  |
| Units: Subjects               |          |       |  |
| Negative                      | 41       | 41    |  |



## End points

### End points reporting groups

|                                                            |         |
|------------------------------------------------------------|---------|
| Reporting group title                                      | CPHPC   |
| Reporting group description: -                             |         |
| Reporting group title                                      | Placebo |
| Reporting group description: -                             |         |
| Reporting group title                                      | CPHPC   |
| Reporting group description:                               |         |
| Receiving active IMP, CPHPC, plus vaccines                 |         |
| Reporting group title                                      | Placebo |
| Reporting group description:                               |         |
| Control arm receiving normal saline infusion plus vaccines |         |

### Primary: Magnitude and breadth of differences in T cell frequencies between randomised groups

|                                                                                                                                                                                                           |                                                                                      |
|-----------------------------------------------------------------------------------------------------------------------------------------------------------------------------------------------------------|--------------------------------------------------------------------------------------|
| End point title                                                                                                                                                                                           | Magnitude and breadth of differences in T cell frequencies between randomised groups |
| End point description:                                                                                                                                                                                    |                                                                                      |
| The magnitude and breadth of differences in T cell frequencies between randomised groups as measured by the ex vivo IFN- $\gamma$ ELISPOT assay on peripheral blood mononuclear cells (PBMCs) of subjects |                                                                                      |
| The primary analysis will involve the calculation of the difference between SAP depleted and control group participants in log <sub>10</sub> transformed IFN- $\gamma$ ELISPOT data at 12 weeks.          |                                                                                      |
| End point type                                                                                                                                                                                            | Primary                                                                              |
| End point timeframe:                                                                                                                                                                                      |                                                                                      |
| Peak ELISpot responses after ChAd63.HIVconsV and MVA.HIV.consv                                                                                                                                            |                                                                                      |

| End point values                            | CPHPC               | Placebo             |  |  |
|---------------------------------------------|---------------------|---------------------|--|--|
| Subject group type                          | Reporting group     | Reporting group     |  |  |
| Number of subjects analysed                 | 19                  | 20                  |  |  |
| Units: SFU/million                          |                     |                     |  |  |
| median (full range (min-max))               |                     |                     |  |  |
| Magnitude of response after ChAd63.HIVconsV | 1130 (40 to 6215)   | 835 (135 to 2785)   |  |  |
| Magnitude of response after MVA.HIVconsV    | 4020 (1440 to 9870) | 3345 (830 to 20305) |  |  |
| Breadth of response                         | 6 (0 to 6)          | 4.5 (1 to 6)        |  |  |

### Statistical analyses

|                                       |                                           |
|---------------------------------------|-------------------------------------------|
| Statistical analysis title            | Mann Whitney Test for non-parametric data |
| Statistical analysis description:     |                                           |
| Comparison of medians from each group |                                           |
| Comparison groups                     | CPHPC v Placebo                           |

|                                         |                                  |
|-----------------------------------------|----------------------------------|
| Number of subjects included in analysis | 39                               |
| Analysis specification                  | Pre-specified                    |
| Analysis type                           | equivalence                      |
| P-value                                 | < 0.05                           |
| Method                                  | Wilcoxon (Mann-Whitney)          |
| Parameter estimate                      | Median difference (final values) |
| Confidence interval                     |                                  |
| level                                   | 95 %                             |
| sides                                   | 2-sided                          |

---

**Primary: Safety and tolerability- the number of Grade 3 or Grade 4 local or systemic reactions**

|                 |                                                                                                      |
|-----------------|------------------------------------------------------------------------------------------------------|
| End point title | Safety and tolerability- the number of Grade 3 or Grade 4 local or systemic reactions <sup>[1]</sup> |
|-----------------|------------------------------------------------------------------------------------------------------|

End point description:

The primary safety and tolerability endpoint will be the development of grade 3 or 4 (severe or very severe) local or systemic reactions after administration of CPHPC infusion followed by either of the HIVcons v vaccines. Due to the small number of participants, results will be purely descriptive.

|                |         |
|----------------|---------|
| End point type | Primary |
|----------------|---------|

End point timeframe:

0-20 weeks

Notes:

[1] - No statistical analyses have been specified for this primary end point. It is expected there is at least one statistical analysis for each primary end point.

Justification: Due to the number of participants in this study, it is intended that the primary safety analysis will be descriptive.

| End point values            | CPHPC           | Placebo         |  |  |
|-----------------------------|-----------------|-----------------|--|--|
| Subject group type          | Reporting group | Reporting group |  |  |
| Number of subjects analysed | 19              | 20              |  |  |
| Units: AEs                  |                 |                 |  |  |
| Grade 3                     | 0               | 0               |  |  |
| Grade 4                     | 0               | 0               |  |  |

**Statistical analyses**

No statistical analyses for this end point

---

**Secondary: Further characterization of the vaccine elicited immune responses**

|                 |                                                                   |
|-----------------|-------------------------------------------------------------------|
| End point title | Further characterization of the vaccine elicited immune responses |
|-----------------|-------------------------------------------------------------------|

End point description:

Although the ELISPOT assay is a very useful and well validated first-line approach to enumeration of specific T cells induced by vaccination, the relationship of IFN- $\gamma$  production to protection against HIV-1-infection is uncertain. Luminex provides a sensitive measurement of interferon gamma and granzyme B, both associated with CD8+ anti-viral responses

|                |           |
|----------------|-----------|
| End point type | Secondary |
|----------------|-----------|

End point timeframe:

Measurements after DNA.HIVcons v and ChAd63.HIVcons v vaccination

| <b>End point values</b>                 | CPHPC                   | Placebo                 |  |  |
|-----------------------------------------|-------------------------|-------------------------|--|--|
| Subject group type                      | Reporting group         | Reporting group         |  |  |
| Number of subjects analysed             | 19                      | 20                      |  |  |
| Units: pg/ml                            |                         |                         |  |  |
| median (full range (min-max))           |                         |                         |  |  |
| Granzyme response after DNA.HIVconsv    | -15.1 (-45.15 to 22.25) | 1.71 (-18.85 to 104.71) |  |  |
| Granzyme response after ChAd63.HIVconsv | 112.8 (35.5 to 464.5)   | 115.1 (55.8 to 303.7)   |  |  |

### Statistical analyses

|                                         |                                  |
|-----------------------------------------|----------------------------------|
| <b>Statistical analysis title</b>       | Wilcoxon Mann-Witney test        |
| Statistical analysis description:       |                                  |
| Comparison of medians                   |                                  |
| Comparison groups                       | CPHPC v Placebo                  |
| Number of subjects included in analysis | 39                               |
| Analysis specification                  | Pre-specified                    |
| Analysis type                           | equivalence                      |
| P-value                                 | < 0.05                           |
| Method                                  | Wilcoxon (Mann-Whitney)          |
| Parameter estimate                      | Median difference (final values) |

## Adverse events

### Adverse events information

Timeframe for reporting adverse events:

From first CPHPC infusion to end of study

Adverse event reporting additional description:

Number of subjects who experienced adverse effects thought to be probably related or possibly related to CPHPC or vaccines.

|                 |            |
|-----------------|------------|
| Assessment type | Systematic |
|-----------------|------------|

### Dictionary used

|                 |                  |
|-----------------|------------------|
| Dictionary name | Division of AIDS |
|-----------------|------------------|

|                    |      |
|--------------------|------|
| Dictionary version | 2004 |
|--------------------|------|

### Reporting groups

|                       |       |
|-----------------------|-------|
| Reporting group title | CPHPC |
|-----------------------|-------|

Reporting group description:

Arm A, treatment group receiving CPHPC. Number of subjects who experienced non-serious adverse events deemed to be related or possibly related to CPHPC or vaccines.

|                       |         |
|-----------------------|---------|
| Reporting group title | Placebo |
|-----------------------|---------|

Reporting group description:

Related or possibly related non-serious adverse events in subjects who received placebo infusion and vaccines

| <b>Serious adverse events</b>                     | CPHPC          | Placebo        |  |
|---------------------------------------------------|----------------|----------------|--|
| Total subjects affected by serious adverse events |                |                |  |
| subjects affected / exposed                       | 0 / 20 (0.00%) | 0 / 20 (0.00%) |  |
| number of deaths (all causes)                     | 0              | 0              |  |
| number of deaths resulting from adverse events    | 0              | 0              |  |

Frequency threshold for reporting non-serious adverse events: 5 %

| <b>Non-serious adverse events</b>                     | CPHPC            | Placebo          |  |
|-------------------------------------------------------|------------------|------------------|--|
| Total subjects affected by non-serious adverse events |                  |                  |  |
| subjects affected / exposed                           | 13 / 20 (65.00%) | 16 / 20 (80.00%) |  |
| Cardiac disorders                                     |                  |                  |  |
| Hypertension                                          |                  |                  |  |
| subjects affected / exposed                           | 1 / 20 (5.00%)   | 0 / 20 (0.00%)   |  |
| occurrences (all)                                     | 1                | 0                |  |
| Blood and lymphatic system disorders                  |                  |                  |  |
| Enlarged lymph node in neck                           |                  |                  |  |
| subjects affected / exposed                           | 0 / 20 (0.00%)   | 1 / 20 (5.00%)   |  |
| occurrences (all)                                     | 0                | 1                |  |

|                                                      |                                                    |                 |  |
|------------------------------------------------------|----------------------------------------------------|-----------------|--|
| General disorders and administration site conditions |                                                    |                 |  |
| Headache                                             | Additional description: Headache                   |                 |  |
| alternative assessment type: Non-systematic          |                                                    |                 |  |
| subjects affected / exposed                          | 4 / 20 (20.00%)                                    | 7 / 20 (35.00%) |  |
| occurrences (all)                                    | 5                                                  | 11              |  |
| Fatigue                                              | Additional description: Fatigue, lethargy, malaise |                 |  |
| alternative assessment type: Non-systematic          |                                                    |                 |  |
| subjects affected / exposed                          | 2 / 20 (10.00%)                                    | 5 / 20 (25.00%) |  |
| occurrences (all)                                    | 2                                                  | 6               |  |
| Insomnia                                             |                                                    |                 |  |
| alternative assessment type: Non-systematic          |                                                    |                 |  |
| subjects affected / exposed                          | 1 / 20 (5.00%)                                     | 1 / 20 (5.00%)  |  |
| occurrences (all)                                    | 1                                                  | 1               |  |
| Pain                                                 | Additional description: Stomach cramps             |                 |  |
| alternative assessment type: Non-systematic          |                                                    |                 |  |
| subjects affected / exposed                          | 1 / 20 (5.00%)                                     | 0 / 20 (0.00%)  |  |
| occurrences (all)                                    | 1                                                  | 0               |  |
| Dizziness                                            |                                                    |                 |  |
| alternative assessment type: Non-systematic          |                                                    |                 |  |
| subjects affected / exposed                          | 0 / 20 (0.00%)                                     | 1 / 20 (5.00%)  |  |
| occurrences (all)                                    | 0                                                  | 1               |  |
| Fever                                                |                                                    |                 |  |
| subjects affected / exposed                          | 0 / 20 (0.00%)                                     | 2 / 20 (10.00%) |  |
| occurrences (all)                                    | 0                                                  | 2               |  |
| Rigors                                               | Additional description: Shivers                    |                 |  |
| alternative assessment type: Non-systematic          |                                                    |                 |  |
| subjects affected / exposed                          | 0 / 20 (0.00%)                                     | 1 / 20 (5.00%)  |  |
| occurrences (all)                                    | 0                                                  | 1               |  |
| Gastrointestinal disorders                           |                                                    |                 |  |
| Diarrhoea                                            |                                                    |                 |  |
| alternative assessment type: Non-systematic          |                                                    |                 |  |
| subjects affected / exposed                          | 1 / 20 (5.00%)                                     | 0 / 20 (0.00%)  |  |
| occurrences (all)                                    | 1                                                  | 0               |  |

|                                                 |                                                                                                               |                  |  |
|-------------------------------------------------|---------------------------------------------------------------------------------------------------------------|------------------|--|
| Dysphagia                                       | Additional description: Sore throat, enlarged tonsils                                                         |                  |  |
| subjects affected / exposed                     | 2 / 20 (10.00%)                                                                                               | 1 / 20 (5.00%)   |  |
| occurrences (all)                               | 3                                                                                                             | 1                |  |
| Nausea                                          |                                                                                                               |                  |  |
| alternative assessment type: Non-systematic     |                                                                                                               |                  |  |
| subjects affected / exposed                     | 1 / 20 (5.00%)                                                                                                | 2 / 20 (10.00%)  |  |
| occurrences (all)                               | 1                                                                                                             | 2                |  |
| Vomiting                                        |                                                                                                               |                  |  |
| alternative assessment type: Non-systematic     |                                                                                                               |                  |  |
| subjects affected / exposed                     | 0 / 20 (0.00%)                                                                                                | 1 / 20 (5.00%)   |  |
| occurrences (all)                               | 0                                                                                                             | 1                |  |
| Anorexia                                        | Additional description: Loss of appetite                                                                      |                  |  |
| alternative assessment type: Non-systematic     |                                                                                                               |                  |  |
| subjects affected / exposed                     | 0 / 20 (0.00%)                                                                                                | 1 / 20 (5.00%)   |  |
| occurrences (all)                               | 0                                                                                                             | 1                |  |
| Renal and urinary disorders                     |                                                                                                               |                  |  |
| Abnormal odour in urine                         |                                                                                                               |                  |  |
| alternative assessment type: Non-systematic     |                                                                                                               |                  |  |
| subjects affected / exposed                     | 0 / 20 (0.00%)                                                                                                | 1 / 20 (5.00%)   |  |
| occurrences (all)                               | 0                                                                                                             | 1                |  |
| Skin and subcutaneous tissue disorders          |                                                                                                               |                  |  |
| Cutaneous reaction - rash                       | Additional description: Rash, psoriasis                                                                       |                  |  |
| subjects affected / exposed                     | 2 / 20 (10.00%)                                                                                               | 2 / 20 (10.00%)  |  |
| occurrences (all)                               | 2                                                                                                             | 2                |  |
| Musculoskeletal and connective tissue disorders |                                                                                                               |                  |  |
| Injection site reaction                         | Additional description: Injection site pain (pain without touching )or tenderness (pain when area is touched) |                  |  |
| alternative assessment type: Non-systematic     |                                                                                                               |                  |  |
| subjects affected / exposed                     | 9 / 20 (45.00%)                                                                                               | 12 / 20 (60.00%) |  |
| occurrences (all)                               | 13                                                                                                            | 17               |  |
| Myalgia                                         | Additional description: Generalised aches and pains, muscle pains, 'flu-like symptoms                         |                  |  |
| alternative assessment type: Non-systematic     |                                                                                                               |                  |  |
| subjects affected / exposed                     | 7 / 20 (35.00%)                                                                                               | 8 / 20 (40.00%)  |  |
| occurrences (all)                               | 8                                                                                                             | 9                |  |
| Neck stiffness                                  |                                                                                                               |                  |  |

|                                                                                                 |                                         |                      |  |
|-------------------------------------------------------------------------------------------------|-----------------------------------------|----------------------|--|
| alternative assessment type: Non-systematic<br>subjects affected / exposed<br>occurrences (all) | 0 / 20 (0.00%)<br>0                     | 1 / 20 (5.00%)<br>1  |  |
| Infections and infestations<br>Coryzal symptoms                                                 | Additional description: Cold, head cold |                      |  |
| alternative assessment type: Non-systematic<br>subjects affected / exposed<br>occurrences (all) | 0 / 20 (0.00%)<br>0                     | 2 / 20 (10.00%)<br>2 |  |

## More information

### Substantial protocol amendments (globally)

Were there any global substantial amendments to the protocol? Yes

| Date              | Amendment                                                                                                                                                                                                                                                                                                                                                                                                                                                                                                                                                                                                                                                                                                                                                                                                  |
|-------------------|------------------------------------------------------------------------------------------------------------------------------------------------------------------------------------------------------------------------------------------------------------------------------------------------------------------------------------------------------------------------------------------------------------------------------------------------------------------------------------------------------------------------------------------------------------------------------------------------------------------------------------------------------------------------------------------------------------------------------------------------------------------------------------------------------------|
| 25 April 2013     | Changes made in response to a grounds for non-acceptance letter from the MHRA (regarding the initial application).                                                                                                                                                                                                                                                                                                                                                                                                                                                                                                                                                                                                                                                                                         |
| 04 July 2013      | To document that any amendments submitted by GSK to the IMPD referred to in the cross-referral letter (dated 2 Jan 13) submitted in the original application will be applicable for this trial. GSK recently submitted an amendment to that IMPD allowing for an extension to the expiry date of the product.                                                                                                                                                                                                                                                                                                                                                                                                                                                                                              |
| 02 December 2013  | <p>To extend the shelf life of ChAdV63.HIVconsv. The substantial amendment includes a revision of the data presented in the IMPD Section 2.1 Quality Data for ChAdV63.HIVconsv, Section 2.1.P.8 (Stability). The amendment also includes a proposal for further shelf life extensions in the future (when additional data become available), without the need to submit further substantial amendments.</p> <p>The version and date of section 2.1 of the IMPD for the pSG2.HIVconsv DNA vaccine, and sections 2.2 and 2.3 of the IMPDs for the pSG2.HIVconsv DNA vaccine and the ChAdV63.HIVconsv vaccine have been updated to version 3.0, 28 Nov 2013, for consistency with section 2.1 of the IMPD for ChAdV63.HIVconsv vaccine, although no changes have been made to these sections of the IMPD.</p> |
| 03 September 2014 | Transfer of Site Responsibilities from University College London Hospitals NHS Trust to Royal Free Hospital NHS Trust. Also addition of another IMP.                                                                                                                                                                                                                                                                                                                                                                                                                                                                                                                                                                                                                                                       |
| 27 October 2014   | <p>Response to Notice of Acceptance with Condition for Amendment 7- MA Licensing) Following the submission of Substantial Amendment 7 and Non-substantial amendment 6 to the MHRA, the MHRA responded with a Notice of Acceptance which was conditional. The condition was to provide additional documentation (Manufacturing authorisation) as listed above as another substantial amendment to the study.</p> <p>Notification of IMPD changes<br/>We have updated the IMPD to reflect that after the immunogenicity/potency tests that have been done on the MVA.HIV.consv vaccine this year (2014) to extend shelf life; we will continue doing these annually to determine whether to extend the shelf life. Shelf life will only be extended if the tests are within the product specifications.</p>  |

Notes:

### Interruptions (globally)

Were there any global interruptions to the trial? Yes

| Date         | Interruption                                                                                                              | Restart date     |
|--------------|---------------------------------------------------------------------------------------------------------------------------|------------------|
| 21 July 2014 | To transfer dosing responsibilities from University College London Hospitals NHS Trust to Royal Free Hospitals NHS Trust. | 04 December 2014 |

Notes:

### Limitations and caveats



None reported
