# Supplementary material for: Randomized phase I trial HIV-CORE 003: Depletion of serum amyloid P component and immunogenicity of DNA vaccination against HIV-1
Source: PubMed Central journal article supplement (PMC5957335; doi:10.1371/journal.pone.0197299), 2018-05-17
Supplement: pone.0197299.s008.pdf [file pone.0197299.s008.pdf]

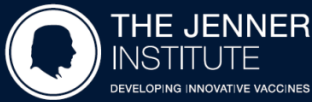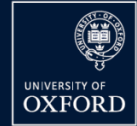

## **HIV-CORE 003: Statistical Report**

**Title:** A randomised double-blind, placebo-controlled phase I/IIa trial to investigate the effect of depletion of serum amyloid P component (SAP) on the immune response to DNA vaccination in healthy male volunteers.

**Sponsor:** University College London

**Chief Investigator at Jenner:** Professor Tomas Hanke

**Senior Immunologist at Jenner:** Dr Nicola J. Borthwick

**Version:** 1.0

**Date:** 29 AUG 2017

**CONFIDENTIAL**

## Introduction

HIV-CORE 003 is a proof of concept (PoC) clinical trial to test the impact of serum amyloid P component depletion by (R)-1-[6-[(R)-2-carboxypyrrolidin-1-yl]-6-oxo-hexanoyl]pyrrolidine-2-carboxylic acid (CPHPC) on the immune response to DNA vaccination in human volunteers. Although the ultimate goal is to make DNA vaccination a practicable and clinically effective approach in humans, the purpose of the present project is simply to establish PoC that SAP depletion augments the immune response induced by DNA vaccines. This report summarises the fresh ELISpot data from the HIV-CORE 003 study which took place in London, UK between October 2013 and February 2016.

## 1. Study Design

### 1.1. Vaccine schedule

Forty healthy, HIV-1-negative adult males of low risk of HIV-1 infection received experimental vaccines expressing HIV-1-derived immunogen HIVconsv delivered using plasmid DNA as pSG2.HIVconsv (D), engineered non-replicating simian adenovirus as ChAdV63.HIVconsv (C) and non-replicating poxvirus modified vaccinia virus Ankara as MVA.HIVconsv (M) combined into heterologous regimens (Table 1). All vaccines were administered intramuscularly using a needle injection. Prior to each DNA vaccine delivery, participants were randomized into one of two respective groups cD or D receiving a 24-hour infusion of either (R)-1-[6-[(R)-2-carboxypyrrolidin-1-yl]-6-oxo-hexanoyl]pyrrolidine-2-carboxylic acid (CPHPC) or saline as a placebo. CPHPC depletes the serum amyloid P component, which has the highest affinity for DNA of all the proteins present in human blood. The trial was initially designed to compare the cDcDcDC (Groups 1a; n = 4) and DDDC (Group 2a; n = 3) regimens, however, following recruitment of the first 7 volunteers, it was modified to the cDcDcDCM (Group 1b; n = 16) and DDDCM (Group 2b; n = 17) regimens with the aim to further amplify any obtained differences in immunogenicity by an additional MVA.HIVconsv boost (Table 1). Blood samples were taken at each visit for ELISpot analyses (Table 2)

**Table 1: Vaccine schedule**

| Group | n  | Week 0                   | Week 4                   | Week 8                   | Week 12          | Week 16      |
|-------|----|--------------------------|--------------------------|--------------------------|------------------|--------------|
| 1a    | 4  | CPHPC<br>pSG2.HIVconsv   | CPHPC<br>pSG2.HIVconsv   | CPHPC<br>pSG2.HIVconsv   | ChAdV63.HIVconsv |              |
| 1b    | 16 | CPHPC<br>pSG2.HIVconsv   | CPHPC<br>pSG2.HIVconsv   | CPHPC<br>pSG2.HIVconsv   | ChAdV63.HIVconsv | MVA.HIVconsv |
| 2a    | 3  | Placebo<br>pSG2.HIVconsv | Placebo<br>pSG2.HIVconsv | Placebo<br>pSG2.HIVconsv | ChAdV63.HIVconsv |              |
| 2b    | 17 | Placebo<br>pSG2.HIVconsv | Placebo<br>pSG2.HIVconsv | Placebo<br>pSG2.HIVconsv | ChAdV63.HIVconsv | MVA.HIVconsv |

**Table 2: Bleeding schedule**

| Group a      |        | D | D | D | D | C |    |    |    |    |    |    |
|--------------|--------|---|---|---|---|---|----|----|----|----|----|----|
| Study week   | Screen | 0 | 2 | 4 | 6 | 8 | 10 | 12 | 14 | 16 | 18 | 20 |
| Visit Number | 1      | 2 | 3 | 4 | 5 | 6 | 7  | 8  | 9  | 10 | 11 | 12 |
| ELISpot      | X      | X | X | X | X | X | X  | X  | X  | X  | X  | X  |

| Group b      |        | D  | D | D  | C | M  |    |    |    |    |    |    |    |    |
|--------------|--------|----|---|----|---|----|----|----|----|----|----|----|----|----|
| Study week   | Screen | 0  | 2 | 4  | 6 | 8  | 10 | 12 | 13 | 14 | 16 | 17 | 18 | 20 |
| Visit Number | 1      | 2a | 3 | 4a | 5 | 6a | 7  | 8  | 9  | 10 | 11 | 12 | 13 | 14 |
| ELISpot      | X      | X  | X | X  | X | X  | X  | X  | X  | X  | X  | X  | X  | X  |

**1.2. Ex vivo IFN- $\gamma$ /ELISpots**

Blood processing and IFN- $\gamma$ /ELISpot analyses were performed at The Jenner Institute, University of Oxford, Oxford, UK. A panel of 199 overlapping 15 mer peptides covering the sequence of the HIVconsv immunogen were split into 6 pools and assayed in triplicate as shown (Fig. 1). Positive controls were wells containing PHA and a pool of commonly reactive Flu', EBV & CMV peptides (FEC). Negative controls (mock) were cells cultured without peptide. There was also an external positive control, NKL, a cell line that releases IFN- $\gamma$  in response to stimulation with PMA & ionomycin.

Fig.1 Plate layout for the ELISpot assays

|   | 1    | 2  | 3  | 4   | 5    | 6  | 7  | 8   | 9    | 10 | 11 | 12  |
|---|------|----|----|-----|------|----|----|-----|------|----|----|-----|
| A |      |    |    |     |      |    |    |     |      |    |    |     |
| B | PHA  | P1 | P3 | P5  | PHA  | P1 | P3 | P5  | PHA  | P1 | P3 | P5  |
| C |      |    |    |     |      |    |    |     |      |    |    |     |
| D | FEC  | P2 | P4 | P6  | FEC  | P2 | P4 | P6  | FEC  | P2 | P4 | P6  |
| E |      |    |    |     |      |    |    |     |      |    |    |     |
| F |      |    |    |     |      |    |    |     |      |    |    |     |
| G | Mock |    |    | NKL | Mock |    |    | NKL | Mock |    |    | NKL |
| H | Mock |    |    |     | Mock |    |    |     | Mock |    |    |     |

|          |                                                                                     |
|----------|-------------------------------------------------------------------------------------|
| Sample 1 |    |
| Sample 2 |   |
| Sample 3 |  |

**2. Definition of positive responses**

**2.1. Exclusion of samples from analysis**

Prior to analysis, all samples were checked for extreme outliers (i.e. unusually high or low counts in the wells). Any control or peptide well whose individual replicate value is inconsistent with the median was excluded. For peptide wells and FEC control wells, any minimum or maximum outlier was excluded. For mock wells only maximum outliers were excluded. For example, where one replicate is discarded, the peptide pool response would be the median of the two remaining replicates and the mock response would be the median of the 5 remaining replicates.

**2.2. Acceptance Criteria**

*INTERNAL POSITIVE CONTROL*

PHA and FEC are included for each sample as internal positive controls. Wells containing PHA should show obvious staining such that they are “saturated”; indicated by TNTC by the ELISpot plate reader or have at least 100 SFU per well.

FEC (Flu, EBV, CMV) control individual participants responses over time and can be useful if it is suspected that samples have been confused or miss-labelled etc. FEC response do not however influence PASS/FAIL criteria unless there is no PHA response

*EXTERNAL POSITIVE CONTROL*

NKL cells are included as an external positive control to ensure that none of the steps have been missed during plate development. Plates should be failed if samples show no spots but NKL wells show the expected spots or if there are no spots at all.

*INTERNAL NEGATIVE CONTROL*

The six mock wells are the negative control. These should normally be median >100 SFU/million (20 spots/well @  $2.0 \times 10^5$  cells/well). Some people have a naturally high and consistent mock response and in this trial people are not excluded because of consistently high mock responses.

An ELISpot response is positive if the following criteria are fulfilled:

- There are at least two valid peptide replicates after discarding outliers
- The median number of background-subtracted spots in a set is greater than 38 SFU/ $10^6$  PBMC
- Median SFU is greater than 4 x mock
- One pre-immune response is negative (i.e. there are no cross-reactive responses)

### 3. Sample size

Table 3 shows the number of samples included/excluded from the analysis at each visit. Of a total of 520 samples received, 11 (2.1%) failed

**Table 3: Number of ELISpot assay results included in the analysis**

| Status | Group        | Total      | Screen    | 0         | 2         | 4         | 6         | 8         | 10        | 12        | 13        | 14        | 16        | 17        | 18        | 20        |
|--------|--------------|------------|-----------|-----------|-----------|-----------|-----------|-----------|-----------|-----------|-----------|-----------|-----------|-----------|-----------|-----------|
| Pass   | Group 1      | 251        | 17        | 20        | 20        | 19        | 20        | 18        | 17        | 19        | 16        | 19        | 19        | 16        | 15        | 16        |
|        | Group 2      | 258        | 20        | 19        | 20        | 19        | 18        | 20        | 20        | 20        | 16        | 20        | 18        | 16        | 16        | 16        |
|        | Total        | 509        | 37        | 39        | 40        | 38        | 38        | 38        | 37        | 39        | 32        | 39        | 37        | 32        | 31        | 32        |
| Fail   | Group 1      | 6          | 3         |           |           | 1         |           | 1         | 1         |           |           |           |           |           |           |           |
|        | Group 2      | 5          |           | 1         |           | 1         | 2         |           |           |           |           | 1         |           |           |           |           |
|        | Total        | 11         | 3         | 1         | 0         | 2         | 2         | 1         | 1         | 0         | 0         | 0         | 1         | 0         | 0         | 0         |
|        | <b>Total</b> | <b>520</b> | <b>40</b> | <b>40</b> | <b>40</b> | <b>40</b> | <b>40</b> | <b>40</b> | <b>39</b> | <b>38</b> | <b>39</b> | <b>32</b> | <b>39</b> | <b>38</b> | <b>32</b> | <b>31</b> |

## 4. Results

### 4.1. Response Rates and Magnitude

Tables 4a and 4b show positive response rates to any peptide pool and the magnitude of the sum of the 6 peptide pools 1-6 in groups 1 and 2. This data is plotted in Fig. 2 below.

**Table 4a: Proportion of positive ELISpot responses and descriptive statistics for Group 1, pools 1-6<sup>a</sup>**

| Week   | N  | % +ve | Mean   | SD    | Median | Min  | Max  |
|--------|----|-------|--------|-------|--------|------|------|
| Screen | 17 | 5.88  | -11.47 | 64.63 | 0      | -180 | 140  |
| 0      | 20 | 0     | -16.75 | 52.8  | -2.5   | -140 | 45   |
| 2      | 20 | 0     | -10.25 | 55.5  | -10    | -195 | 90   |
| 4      | 19 | 0     | -12.63 | 44.83 | 0      | -110 | 40   |
| 6      | 20 | 0     | -14.5  | 41.45 | -5     | -115 | 60   |
| 8      | 18 | 0     | -10.83 | 53.61 | -7.5   | -115 | 115  |
| 10     | 17 | 11.76 | 22.06  | 77.28 | -5     | -65  | 220  |
| 12     | 19 | 5.26  | 17.89  | 49.45 | 25     | -75  | 130  |
| 13     | 16 | 62.5  | 1142   | 1811  | 317.5  | -10  | 6215 |
| 14     | 19 | 94.73 | 1445   | 1271  | 890    | 40   | 4950 |
| 16     | 19 | 89.47 | 933.2  | 843.3 | 660    | -5   | 2765 |
| 17     | 16 | 100   | 3563   | 1847  | 3105   | 710  | 7470 |
| 18     | 15 | 100   | 3865   | 2561  | 3670   | 500  | 9870 |
| 20     | 16 | 100   | 3455   | 2127  | 3318   | 190  | 7210 |

<sup>a</sup>The units of analysis are positive response to any pool 1-6 per participant, and for magnitude, the sum of mean background-subtracted responses over pools 1-6 per participant. SD=Standard Deviation

**Table 4b: Proportion of positive ELISpot responses and descriptive statistics for Group 2, pools 1-6<sup>a</sup>**

| Week   | N  | % +ve | Mean   | SD    | Median | Min  | Max   |
|--------|----|-------|--------|-------|--------|------|-------|
| Screen | 20 | 0     | -3.125 | 58.54 | 10     | -110 | 105   |
| 0      | 19 | 0     | -13.16 | 48.34 | -10    | -115 | 65    |
| 2      | 20 | 0     | -31.5  | 95.97 | 0      | -340 | 130   |
| 4      | 19 | 0     | -30    | 73.92 | -20    | -240 | 75    |
| 6      | 18 | 22.2  | 55.56  | 226.6 | 2.5    | -220 | 810   |
| 8      | 20 | 15    | 44     | 105.3 | 20     | -130 | 345   |
| 10     | 20 | 20    | 38.75  | 173.6 | 20     | -230 | 630   |
| 12     | 20 | 10    | 21.38  | 71.67 | 15     | -105 | 185   |
| 13     | 16 | 81.25 | 630.6  | 703.6 | 417.5  | -295 | 2435  |
| 14     | 20 | 85    | 808.5  | 718.1 | 697.5  | 50   | 2385  |
| 16     | 18 | 100   | 653.6  | 610.4 | 465    | 85   | 2785  |
| 17     | 16 | 100   | 3363   | 3207  | 2700   | 830  | 14410 |
| 18     | 16 | 100   | 4714   | 4941  | 3295   | 730  | 20305 |
| 20     | 16 | 100   | 3457   | 3733  | 2630   | 290  | 14575 |

<sup>a</sup>The units of analysis are positive response to any pool 1-6 per participant, and for magnitude, the sum of mean background-subtracted responses over pools 1-6 per participant. SD=Standard Deviation

Fig. 2 Kinetics of IFN- $\gamma$ /ELISpot summed responses pools 1-6. The median, range and individual values are plotted for each visit

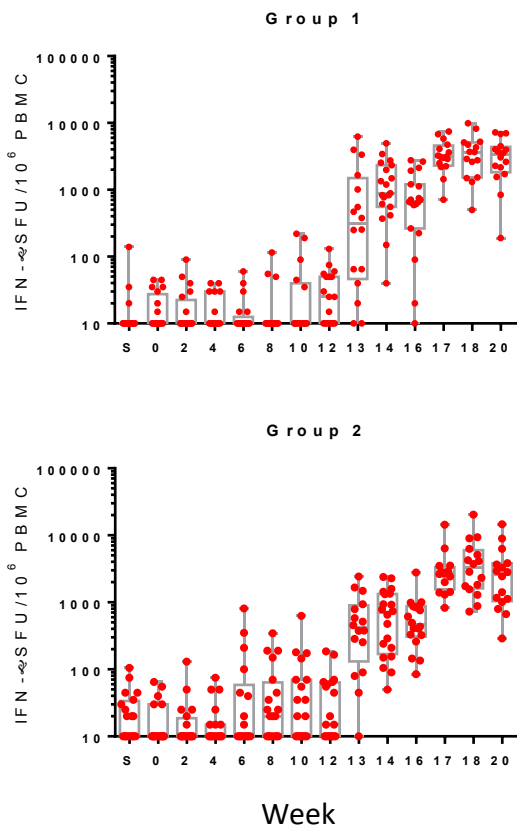

### 4.2 Comparison of peak responses

Peak responses, the greatest number of IFN- $\gamma$ /SFU/10<sup>6</sup> PBMC following vaccination, were identified for each participant as follows:

DNA.HIVconsv: visits 3-8 groups a & b

ChAd63.HIVconsv: visits 9-11 group a & b

MVA.HIVconsv: visits 12-14 group b

The peak values for each group at these three time points were compared using the Mann Whitney test for nonparametric data, using a significance level P=0.05

**Table 4c IFN- $\gamma$ /ELISpot responses at peak response times, group 1, pools 1-6**

| Peak   | N  | Mean  | SD    | Median | Min  | Max  |
|--------|----|-------|-------|--------|------|------|
| DNA    | 19 | 62.11 | 59.26 | 45     | 5    | 220  |
| ChAd63 | 19 | 1849  | 1703  | 1130   | 40   | 6215 |
| MVA    | 16 | 4435  | 2379  | 4020   | 1440 | 9870 |

**Table 4d IFN- $\gamma$ /ELISpot responses at peak response times, group 2, pools 1-6**

| Peak   | N  | Mean  | SD    | Median | Min | Max   |
|--------|----|-------|-------|--------|-----|-------|
| DNA    | 20 | 111.5 | 190.2 | 47.5   | -65 | 810   |
| ChAd63 | 20 | 1003  | 812.5 | 835    | 135 | 2785  |
| MVA    | 16 | 4982  | 4774  | 3345   | 830 | 20305 |

**Table 4e Comparison of data at peak time points using the Mann Whitney test**

|                 | Mann Whitney U | P value | Significantly different? |
|-----------------|----------------|---------|--------------------------|
| DNA.HIVconsv    | 187            | 0.939   | No                       |
| ChAd63.HIVconsv | 137            | 0.1415  | No                       |
| MVA.HIV.consv   | 114.5          | 0.6221  | No                       |

Fig. 3

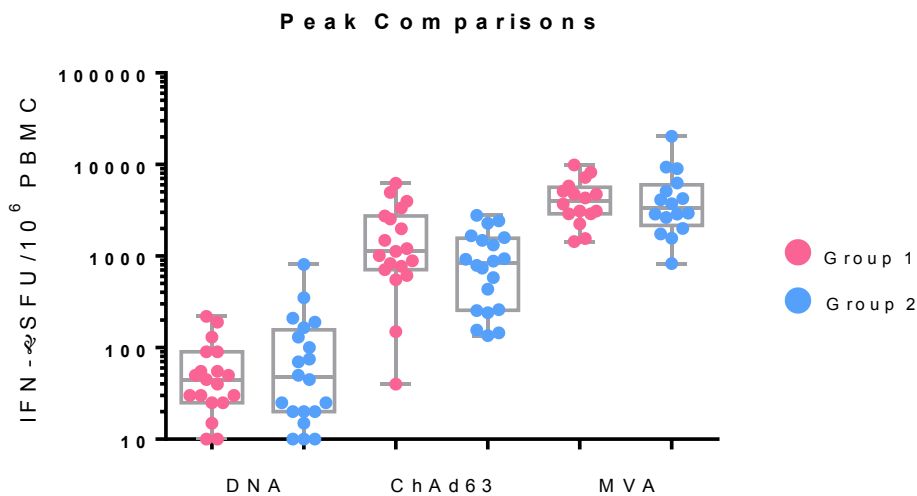

4.3 Responses to individual peptide pools

Peptide pool 1

Table 4f Proportion of positive ELISpot responses and descriptive statistics for Group 1, pool 1<sup>a</sup>

| Week | N  | % +ve | Mean   | SD    | Median | Min   | Max   |
|------|----|-------|--------|-------|--------|-------|-------|
| 0    | 19 | 0     | -4.47  | 13.76 | -2.5   | -37.5 | 10    |
| 2    | 19 | 0     | -3.97  | 13.41 | -2.5   | -47.5 | 15    |
| 4    | 19 | 0     | -1.58  | 6.729 | 0      | -12.5 | 15    |
| 6    | 19 | 0     | -1.84  | 8.243 | -2.5   | -20   | 10    |
| 8    | 18 | 0     | -1.94  | 7.696 | -1.25  | -20   | 10    |
| 10   | 17 | 0     | -2.21  | 12.65 | -2.5   | -32.5 | 20    |
| 12   | 19 | 0     | 2.90   | 10.08 | 2.5    | -17.5 | 25    |
| 13   | 16 | 50    | 209.80 | 387.8 | 42.5   | -2.5  | 1300  |
| 14   | 19 | 78.94 | 233.70 | 242   | 100    | 12.5  | 722.5 |
| 16   | 19 | 68.42 | 162.50 | 181.5 | 102.5  | -2.5  | 732.5 |
| 17   | 16 | 100   | 541.30 | 509.6 | 380    | 60    | 2150  |
| 18   | 15 | 100   | 783.30 | 1022  | 435    | 40    | 4050  |
| 20   | 16 | 87.5  | 650.00 | 885   | 355    | 15    | 3430  |

<sup>a</sup>The units of analysis are positive response to pool 1 per participant, and for magnitude, the background-subtracted responses to pool 1 per participant. SD=Standard Deviation

Table 4g Proportion of positive ELISpot responses and descriptive statistics for Group 2, pool 1<sup>a</sup>

| Week | N  | % +ve | Mean   | SD    | Median | Min   | Max   |
|------|----|-------|--------|-------|--------|-------|-------|
| 0    | 19 | 0     | -3.711 | 11.19 | -5     | -28   | 20    |
| 2    | 20 | 0     | -8.9   | 20.02 | -3.75  | -57.5 | 22.5  |
| 4    | 19 | 0     | -8.289 | 17.08 | -5     | -57.5 | 12.5  |
| 6    | 18 | 11.1  | 9.972  | 52.56 | -1.25  | -50   | 197.5 |
| 8    | 20 | 20    | 14.75  | 32.1  | 3.75   | -20   | 90    |
| 10   | 20 | 5     | 12.23  | 46.99 | 8.75   | -40   | 190   |
| 12   | 20 | 10    | 6.125  | 19.08 | 3.75   | -17.5 | 50    |
| 13   | 16 | 56.25 | 100.9  | 119   | 62.5   | -32.5 | 380   |
| 14   | 20 | 70    | 92.5   | 77.6  | 82.5   | -20   | 310   |
| 16   | 18 | 72.22 | 75.42  | 79.85 | 58.75  | 5     | 352.5 |
| 17   | 16 | 100   | 464.7  | 415.5 | 385    | 40    | 1600  |
| 18   | 16 | 100   | 570.9  | 728.2 | 332.5  | 80    | 3005  |
| 20   | 16 | 93.75 | 396.3  | 663   | 232.5  | 15    | 2770  |

<sup>a</sup>The units of analysis are positive response to pool 1 per participant, and for magnitude, the background-subtracted response to pool 1 per participant. SD=Standard Deviation

Fig. 4 Responses to Pool 1

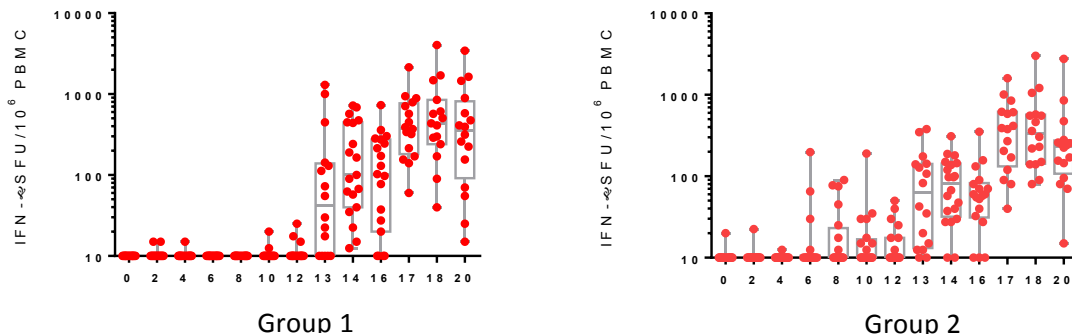

Peptide Pool 2

**Table 4h Proportion of positive ELISpot responses and descriptive statistics for Group 1, pool 2<sup>a</sup>**

| Week | N  | % +ve | Mean        | SD    | Median | Min   | Max   |
|------|----|-------|-------------|-------|--------|-------|-------|
| 0    | 19 | 0     | -3.026      | 8.481 | 0      | -22.5 | 10    |
| 2    | 19 | 0     | 0.1316      | 13.63 | 0      | -37.5 | 30    |
| 4    | 19 | 0     | -<br>0.2632 | 8.287 | 2.5    | -17.5 | 10    |
| 6    | 19 | 0     | 0.5263      | 8.763 | 0      | -20   | 15    |
| 8    | 18 | 0     | -3.611      | 9.441 | -1.25  | -25   | 15    |
| 10   | 17 | 5.88  | 1.912       | 11.74 | 0      | -10   | 40    |
| 12   | 19 | 5.26  | 1.711       | 13.2  | -2.5   | -10   | 50    |
| 13   | 16 | 43.75 | 63.28       | 73.07 | 30     | -2.5  | 207.5 |
| 14   | 19 | 68.42 | 165.9       | 288.9 | 77.5   | 2.5   | 1205  |
| 16   | 19 | 52.63 | 56.45       | 60.35 | 42.5   | -12.5 | 242.5 |
| 17   | 16 | 100   | 310.6       | 386.4 | 217.5  | 45    | 1670  |
| 18   | 15 | 100   | 314         | 351.2 | 185    | 50    | 1370  |
| 20   | 16 | 81.25 | 220         | 223.2 | 180    | 5     | 785   |

<sup>a</sup>The units of analysis are positive response to pool 2 per participant, and for magnitude, the background-subtracted response to pool 2 per participant. SD=Standard Deviation

**Table 4i Proportion of positive ELISpot responses and descriptive statistics for Group 2, pool 2<sup>a</sup>**

| Week | N  | % +ve | Mean   | SD    | Median | Min   | Max   |
|------|----|-------|--------|-------|--------|-------|-------|
| 0    | 19 | 0     | -2.368 | 8.916 | -2.5   | -25   | 17.5  |
| 2    | 20 | 0     | -7.375 | 22.59 | -2.5   | -70   | 17.5  |
| 4    | 19 | 0     | -10.13 | 22.02 | -2.5   | -72.5 | 10    |
| 6    | 18 | 11.1  | 7.778  | 26.39 | 3.75   | -35   | 87.5  |
| 8    | 20 | 5     | 8.5    | 16.11 | 5      | -20   | 42.5  |
| 10   | 20 | 0     | -2.5   | 19.16 | -1.25  | -47.5 | 30    |
| 12   | 20 | 0     | 2.875  | 9.743 | 1.25   | -15   | 25    |
| 13   | 16 | 37.5  | 48.44  | 70.89 | 26.25  | -37.5 | 242.5 |
| 14   | 20 | 40    | 69.25  | 110.5 | 18.75  | -10   | 410   |
| 16   | 18 | 38.89 | 47.08  | 45.22 | 33.75  | -7.5  | 155   |
| 17   | 16 | 81.25 | 255.3  | 265.3 | 162.5  | 10    | 870   |
| 18   | 16 | 75    | 290    | 349.1 | 197.5  | -15   | 1335  |
| 20   | 16 | 68.75 | 206.9  | 353.5 | 110    | 0     | 1470  |

<sup>a</sup>The units of analysis are positive response to pool 2 per participant, and for magnitude, the background-subtracted response to pool 2 per participant. SD=Standard Deviation

Fig. 5 Responses to Pool 2

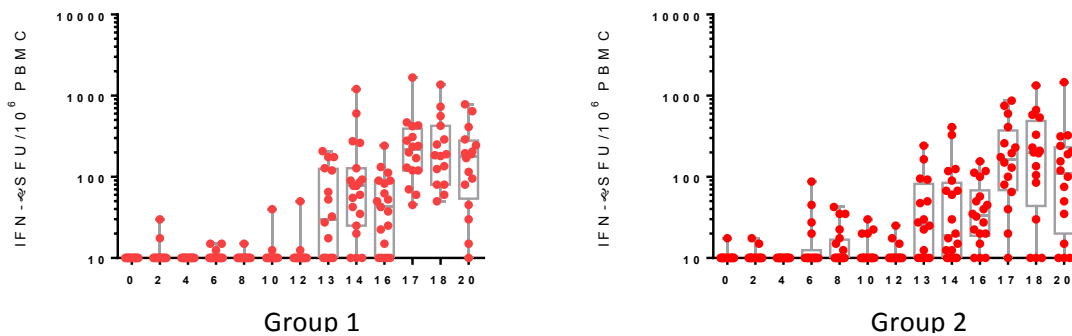



Peptide Pool 3

**Table 4j Proportion of positive ELISpot responses and descriptive statistics for Group 1, pool 3<sup>a</sup>**

| Week | N  | % +ve | Mean    | SD    | Median | Min   | Max  |
|------|----|-------|---------|-------|--------|-------|------|
| 0    | 19 | 0     | -4.34   | 10.03 | 0      | -22.5 | 12.5 |
| 2    | 19 | 0     | -4.08   | 11.25 | -2.5   | -37.5 | 17.5 |
| 4    | 19 | 0     | -5.79   | 12.42 | -5     | -35   | 17.5 |
| 6    | 19 | 0     | -3.68   | 9.143 | 0      | -22.5 | 10   |
| 8    | 18 | 0     | -2.22   | 10.88 | -5     | -20   | 20   |
| 10   | 17 | 11.76 | 8.68    | 36.75 | -2.5   | -35   | 130  |
| 12   | 19 | 5.26  | 2.50    | 14.04 | 0      | -15   | 42.5 |
| 13   | 16 | 56.25 | 218.90  | 470.4 | 51.25  | -27.5 | 1910 |
| 14   | 19 | 89.47 | 334.10  | 508.1 | 187.5  | 12.5  | 2090 |
| 16   | 19 | 73.68 | 317.80  | 521.6 | 150    | -7.5  | 2128 |
| 17   | 16 | 93.75 | 1249.00 | 1133  | 990    | 20    | 3455 |
| 18   | 15 | 100   | 1513.00 | 1535  | 812.5  | 50    | 4560 |
| 20   | 16 | 93.75 | 1535.00 | 1554  | 680    | 5     | 4415 |

<sup>a</sup>The units of analysis are positive response to pool 3 per participant, and for magnitude, the background-subtracted response to pool 3 per participant. SD=Standard Deviation

**Table 4k Proportion of positive ELISpot responses and descriptive statistics for Group 2, pool 3<sup>a</sup>**

| Week | N  | % +ve | Mean    | SD    | Median | Min   | Max   |
|------|----|-------|---------|-------|--------|-------|-------|
| 0    | 19 | 0     | 0.26    | 16.73 | -5     | -30   | 50    |
| 2    | 20 | 0     | -6.63   | 19.16 | -2.5   | -65   | 17.5  |
| 4    | 19 | 0     | -9.87   | 21.09 | -7.5   | -82.5 | 12.5  |
| 6    | 18 | 11.11 | 7.50    | 32.07 | 3.75   | -67.5 | 75    |
| 8    | 20 | 10    | 3.75    | 23.45 | 0      | -40   | 50    |
| 10   | 20 | 10    | 3.75    | 22.53 | 0      | -47.5 | 45    |
| 12   | 20 | 0     | 2.38    | 11.54 | 3.75   | -20   | 27.5  |
| 13   | 16 | 56.25 | 207.80  | 273.4 | 96.25  | -42.5 | 797.5 |
| 14   | 20 | 70    | 285.80  | 395   | 122.5  | 0     | 1595  |
| 16   | 18 | 88.89 | 267.60  | 496.4 | 112.5  | 5     | 2180  |
| 17   | 16 | 100   | 1503.00 | 2461  | 515    | 250   | 10290 |
| 18   | 16 | 100   | 2317.00 | 3943  | 817.5  | 150   | 16220 |
| 20   | 16 | 100   | 1738.00 | 3080  | 497.5  | 95    | 12480 |

<sup>a</sup>The units of analysis are positive response to pool 3 per participant, and for magnitude, the background-subtracted response to pool 3 per participant. SD=Standard Deviation

Fig. 6 Responses to Pool 3

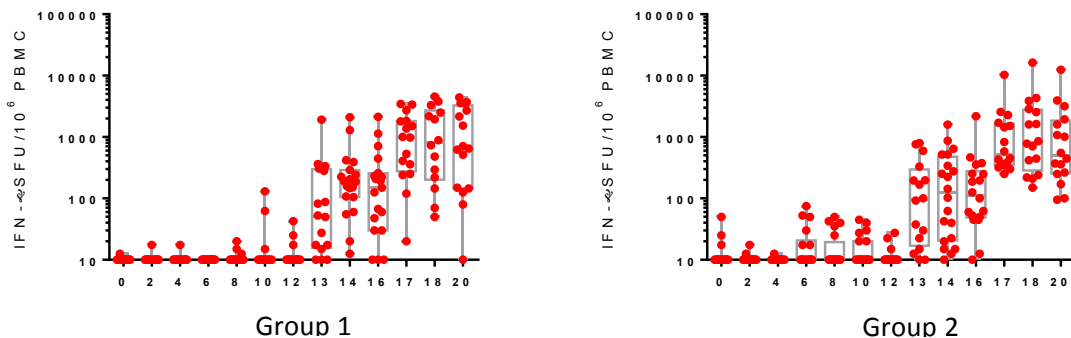

Peptide Pool 4

**Table 4l Proportion of positive ELISpot responses and descriptive statistics for Group 1, pool 4<sup>a</sup>**

| Week | N  | % +ve | Mean   | SD    | Median | Min   | Max  |
|------|----|-------|--------|-------|--------|-------|------|
| 0    | 19 | 0     | -0.92  | 12.48 | -2.5   | -22.5 | 32.5 |
| 2    | 19 | 5.26  | 2.76   | 17.28 | -2.5   | -17.5 | 65   |
| 4    | 19 | 0     | -0.53  | 11.07 | 2.5    | -22.5 | 20   |
| 6    | 19 | 0     | -4.21  | 10.34 | -5     | -20   | 15   |
| 8    | 18 | 0     | 0.83   | 13.53 | 0      | -20   | 30   |
| 10   | 17 | 11.76 | 9.27   | 20.21 | 2.5    | -10   | 52.5 |
| 12   | 19 | 0     | 5.92   | 10.74 | 5      | -15   | 30   |
| 13   | 16 | 62.5  | 321.40 | 611.9 | 65     | -12.5 | 2340 |
| 14   | 19 | 89.47 | 323.60 | 311.4 | 260    | 7.5   | 1060 |
| 16   | 19 | 84.21 | 205.90 | 326.5 | 110    | 2.5   | 1465 |
| 17   | 16 | 100   | 645.00 | 405.6 | 460    | 110   | 1490 |
| 18   | 15 | 100   | 534.60 | 482.6 | 355    | 80    | 1685 |
| 20   | 16 | 100   | 465.60 | 433.2 | 272.5  | 55    | 1325 |

<sup>a</sup>The units of analysis are positive response to pool 4 per participant, and for magnitude, the background-subtracted response to pool 4 per participant. SD=Standard Deviation

**Table 4m Proportion of positive ELISpot responses and descriptive statistics for Group 2, pool 4<sup>a</sup>**

| Week | N  | % +ve  | Mean   | SD     | Median | Min   | Max   |
|------|----|--------|--------|--------|--------|-------|-------|
| 0    | 19 | 0.00   | -2.11  | 7.92   | -5     | -17.5 | 20    |
| 2    | 20 | 0.00   | 2.13   | 13.46  | 5      | -20   | 37.5  |
| 4    | 19 | 5.26   | 1.71   | 17.87  | -2.5   | -32.5 | 57.5  |
| 6    | 18 | 11.10  | 20.00  | 60.62  | 6.25   | -27.5 | 242.5 |
| 8    | 20 | 5.00   | 7.00   | 21.05  | 3.75   | -35   | 67.5  |
| 10   | 20 | 10.00  | 10.00  | 36.80  | 3.75   | -37.5 | 135   |
| 12   | 20 | 5.00   | 5.00   | 16.32  | 5      | -17.5 | 55    |
| 13   | 16 | 62.50  | 139.40 | 175.60 | 80     | -77.5 | 530   |
| 14   | 20 | 75.00  | 107.00 | 87.61  | 90     | -7.5  | 282.5 |
| 16   | 18 | 66.67  | 74.86  | 53.63  | 66.25  | -2.5  | 175   |
| 17   | 16 | 100.00 | 437.80 | 325.00 | 372.5  | 85    | 1150  |
| 18   | 16 | 100.00 | 600.90 | 800.10 | 195    | 65    | 3150  |
| 20   | 16 | 81.25  | 404.40 | 560.10 | 247.5  | 0     | 2245  |

<sup>a</sup>The units of analysis are positive response to pool 4 per participant, and for magnitude, the background-subtracted response to pool 4 per participant. SD=Standard Deviation

Fig. 7 Responses to Pool 4

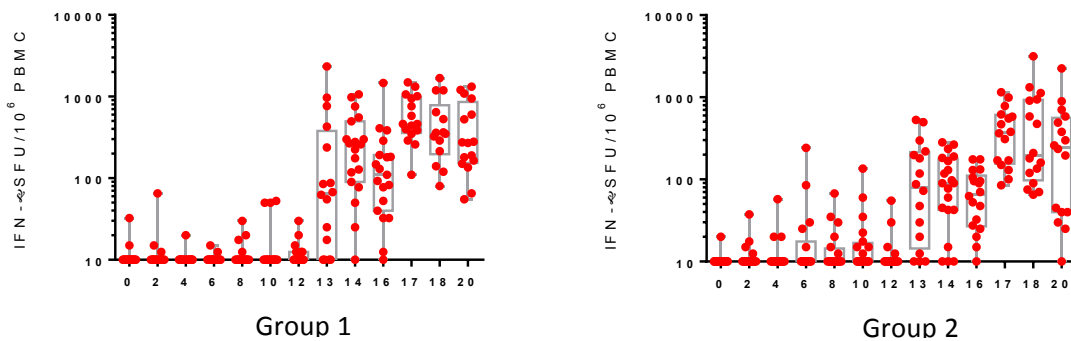

Peptide pool 5

**Table 4n Proportion of positive ELISpot responses and descriptive statistics for Group 1, pool 5<sup>a</sup>**

| Week | N  | % +ve | Mean   | SD    | Median | Min   | Max  |
|------|----|-------|--------|-------|--------|-------|------|
| 0    | 19 | 0     | -1.45  | 12.43 | 0      | -30   | 25   |
| 2    | 19 | 0     | -4.87  | 8.719 | -5     | -27.5 | 12.5 |
| 4    | 19 | 0     | -4.47  | 9.667 | -2.5   | -30   | 10   |
| 6    | 19 | 0     | -4.74  | 9.387 | -5     | -25   | 12.5 |
| 8    | 18 | 0     | -1.94  | 8.25  | -1.25  | -15   | 15   |
| 10   | 17 | 0     | -0.44  | 9.406 | 0      | -17.5 | 15   |
| 12   | 19 | 0     | -1.71  | 9.393 | 0      | -20   | 20   |
| 13   | 16 | 43.75 | 237.30 | 504.4 | 52.5   | 0     | 2010 |
| 14   | 19 | 84.2  | 216.70 | 269.2 | 115    | -2.5  | 1060 |
| 16   | 19 | 68.42 | 100.70 | 166.3 | 65     | -2.5  | 760  |
| 17   | 16 | 93.75 | 350.60 | 225.1 | 345    | 20    | 730  |
| 18   | 15 | 92.86 | 273.90 | 182.3 | 255    | -5    | 635  |
| 20   | 16 | 87.5  | 236.90 | 210.5 | 187.5  | -25   | 855  |

<sup>a</sup>The units of analysis are positive response to pool 5 per participant, and for magnitude, the background-subtracted response to pool 5 per participant. SD=Standard Deviation

**Table 4o Proportion of positive ELISpot responses and descriptive statistics for Group 2, pool 5<sup>a</sup>**

| Week | N  | % +ve | Mean   | SD    | Median | Min   | Max   |
|------|----|-------|--------|-------|--------|-------|-------|
| 0    | 19 | 5.26  | -3.684 | 18.75 | -5     | -37.5 | 45    |
| 2    | 20 | 0     | -6.125 | 17.89 | 0      | -55   | 17.5  |
| 4    | 19 | 0     | -5.132 | 18.68 | -2.5   | -62.5 | 17.5  |
| 6    | 18 | 5.88  | -1.389 | 26.03 | -2.5   | -82.5 | 45    |
| 8    | 20 | 0     | 3.5    | 18.5  | 6.25   | -40   | 32.5  |
| 10   | 20 | 0     | 0.5    | 19.29 | 1.25   | -42.5 | 50    |
| 12   | 20 | 0     | 0.375  | 9.976 | -1.25  | -25   | 20    |
| 13   | 16 | 43.75 | 57.19  | 101.3 | 30     | -57.5 | 402.5 |
| 14   | 20 | 50    | 109.3  | 197.3 | 38.75  | -10   | 670   |
| 16   | 18 | 27.78 | 72.92  | 117.8 | 30     | 2.5   | 417.5 |
| 17   | 16 | 100   | 327.8  | 342.4 | 157.5  | 40    | 1260  |
| 18   | 16 | 93.75 | 413.4  | 616.3 | 137.5  | 25    | 2175  |
| 20   | 16 | 87.5  | 313.8  | 551.2 | 140    | 10    | 2230  |

<sup>a</sup>The units of analysis are positive response to pool 5 per participant, and for magnitude, the background-subtracted response to pool 5 per participant. SD=Standard Deviation

Fig. 8 Responses to Pool 5

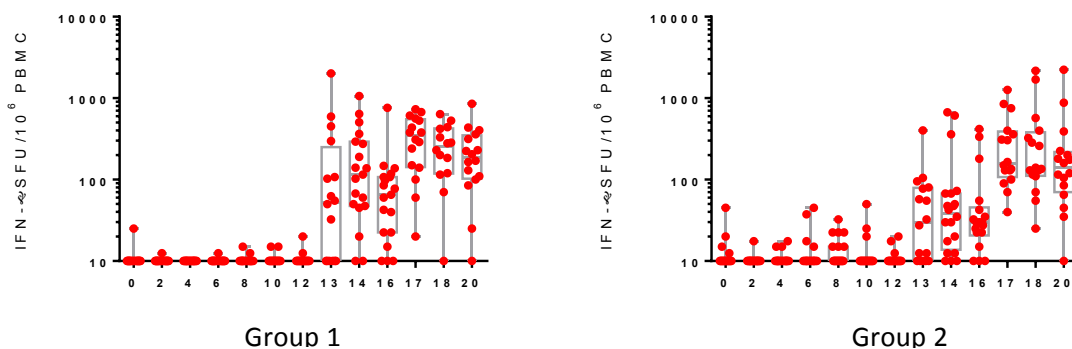

Peptide pool 6

**Table 4p Proportion of positive ELISpot responses and descriptive statistics for Group 1, pool 6<sup>a</sup>**

| Week | N  | % +ve | Mean   | SD     | Median | Min   | Max   |
|------|----|-------|--------|--------|--------|-------|-------|
| 0    | 19 | 0     | -1.97  | 11.77  | 0      | -32.5 | 15    |
| 2    | 19 | 0     | -1.97  | 9.26   | -2.5   | -27.5 | 10    |
| 4    | 19 | 0     | -0.53  | 10.82  | 0      | -22.5 | 20    |
| 6    | 19 | 0     | -0.26  | 7.50   | 0      | -15   | 12.5  |
| 8    | 18 | 0     | -1.39  | 11.67  | -1.25  | -25   | 30    |
| 10   | 17 | 5.56  | 3.47   | 20.65  | -2.5   | -22.5 | 72.5  |
| 12   | 19 | 5.26  | 5.40   | 13.05  | 2.5    | -12.5 | 40    |
| 13   | 16 | 37.5  | 91.09  | 161.10 | 23.75  | -17.5 | 615   |
| 14   | 19 | 89.47 | 171.20 | 158.50 | 155    | 7.5   | 670   |
| 16   | 19 | 73.68 | 89.87  | 113.80 | 55     | -7.5  | 507.5 |
| 17   | 16 | 100   | 466.90 | 370.70 | 407.5  | 60    | 1450  |
| 18   | 15 | 100   | 280.70 | 245.50 | 185    | 70    | 905   |
| 20   | 16 | 93.75 | 348.10 | 453.90 | 162.5  | 30    | 1760  |

<sup>a</sup>The units of analysis are positive response to pool 6 per participant, and for magnitude, the background-subtracted response to pool 6 per participant. SD=Standard Deviation

**Table 4q Proportion of positive ELISpot responses and descriptive statistics for Group 2, pool 6<sup>a</sup>**

| Week | N  | % +ve | Mean   | SD    | Median | Min   | Max   |
|------|----|-------|--------|-------|--------|-------|-------|
| 0    | 19 | 0     | -1.579 | 10.58 | 0      | -20   | 25    |
| 2    | 20 | 0     | -4.625 | 23.37 | 1.25   | -85   | 22.5  |
| 4    | 19 | 0     | 1.711  | 12.53 | 0      | -22.5 | 32.5  |
| 6    | 18 | 11.1  | 11.67  | 55.68 | 0      | -77.5 | 192.5 |
| 8    | 20 | 5     | 6.5    | 25.58 | 5      | -50   | 82.5  |
| 10   | 20 | 37.5  | 14.75  | 49.76 | 3.75   | -32.5 | 210   |
| 12   | 20 | 5     | 4.625  | 18.91 | 0      | -20   | 70    |
| 13   | 16 | 56.25 | 76.88  | 95.85 | 56.25  | -47.5 | 322.5 |
| 14   | 20 | 70    | 144.8  | 157.1 | 80     | -12.5 | 582.5 |
| 16   | 18 | 72.22 | 115.7  | 113.7 | 61.25  | 7.5   | 437.5 |
| 17   | 16 | 100   | 374.1  | 313.3 | 235    | 45    | 1160  |
| 18   | 16 | 93.75 | 522.2  | 554.8 | 282.5  | 25    | 1920  |
| 20   | 16 | 87.5  | 398.1  | 538.5 | 217.5  | 20    | 1905  |

<sup>a</sup>The units of analysis are positive response to pool 6 per participant, and for magnitude, the background-subtracted response to pool 6 per participant. SD=Standard Deviation

Fig. 9 Responses to Pool 6

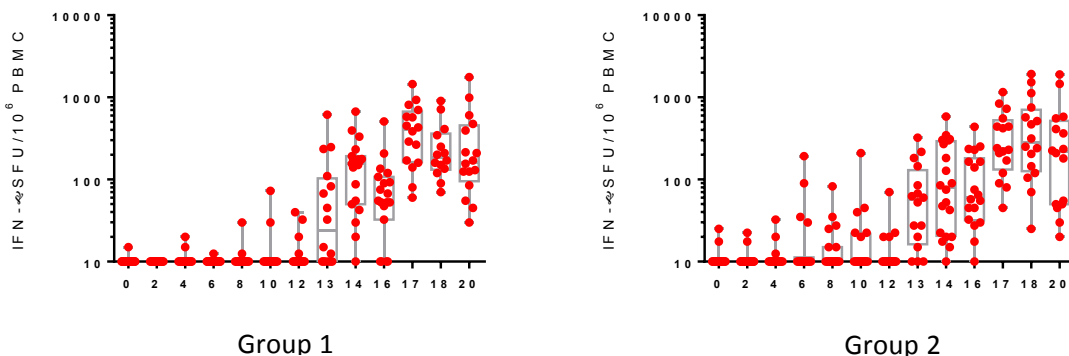

#### 4.4 Breadth of response (number of pools recognised)

The number of pools recognised (SFU/million >38) at the peak following ChAd63.HIVconsv vaccination, visits 9-11, was used to compare the breadth of the response in each group. These were compared using the Mann Whitney test for nonparametric data, using a significance level  $P=0.05$

Table 4r Comparison of the breadth of the response following ChAd63.HIVconsv vaccination

| ChAd63.HIVconsv | N  | Median | Min | Max | Mann Whitney U | P value | Significantly different? |
|-----------------|----|--------|-----|-----|----------------|---------|--------------------------|
| Group 1         | 19 | 6      | 0   | 6   | 123.5          | 0.0444  | Yes                      |
| Group 2         | 20 | 4.5    | 1   | 6   |                |         |                          |
